# Supplementary material for: Synthesis of 2-vinyl-2H-benzotriazoles via NIS-promoted regio/stereoselective addition of 1H-benzotriazole to alkynes
Source: Royal Society of Chemistry journal article supplement (doi:10.1039/c3ra43075h), 2013-01-01

## Supporting Information

*for*

### Synthesis of 2-Vinyl-2*H*-Benzotriazoles via NIS-Promoted Regio-/Stereoselective Addition of 1*H*-Benzotriazole to Alkynes

Zhenhua Zhang,<sup>1</sup> Lina Chang,<sup>1</sup> Shaozhong Wang\*<sup>1</sup>, Huaqin Wang,<sup>2</sup> Zhu-Jun Yao<sup>1</sup>

<sup>1</sup>State Key Laboratory of Coordination Chemistry, School of Chemistry and Chemical Engineering, Nanjing University, Nanjing 210093, P. R. China.

<sup>2</sup>Modern Analytical Center of Nanjing University, Nanjing 210093, P. R. China.

Fax: 86 25 83317761; E-mail: wangsz@nju.edu.cn

#### Contents:

|                                                    |      |
|----------------------------------------------------|------|
| General Information                                | SI-1 |
| <sup>1</sup> H NMR and <sup>13</sup> C NMR Spectra | SI-2 |

#### General information

All melting points were determined without correction. <sup>1</sup>H NMR and <sup>13</sup>C NMR spectra were obtained at 300 MHz and 400 MHz. Spectra were recorded in CDCl<sub>3</sub> solution by using residue solvent as internal standards, *J* values are given in Hz. Mass spectra were obtained with electrospray ionization.

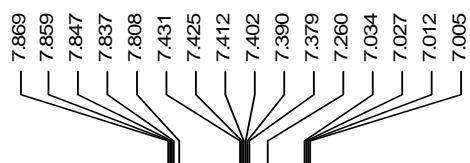

3.883

1.559

0.000

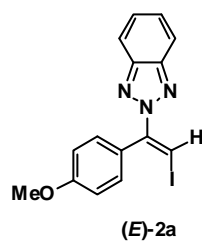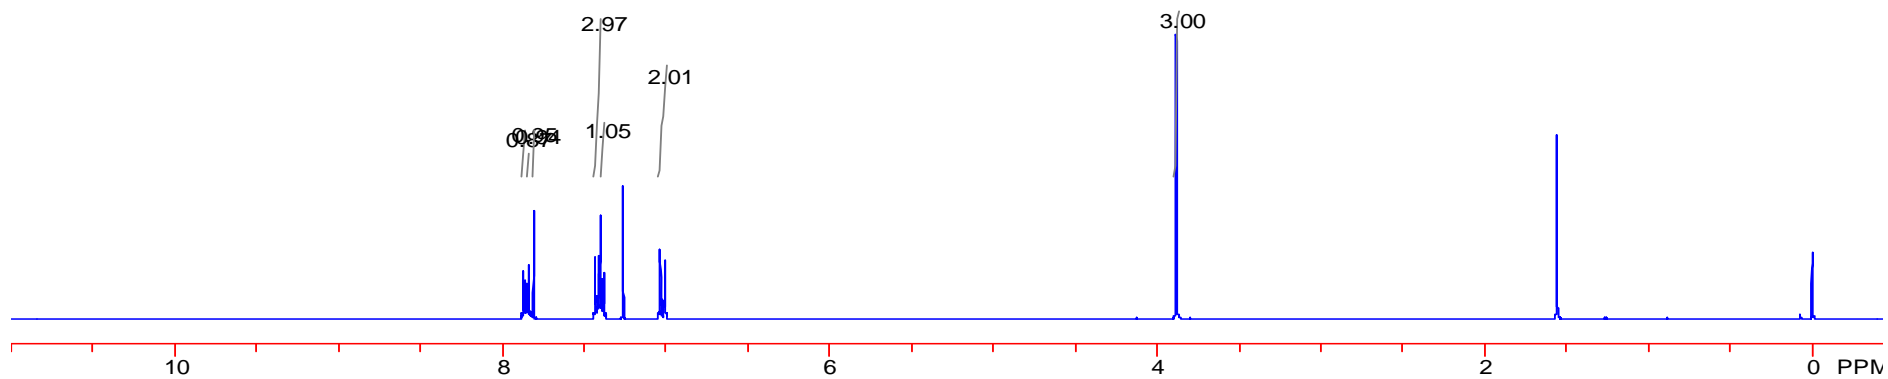

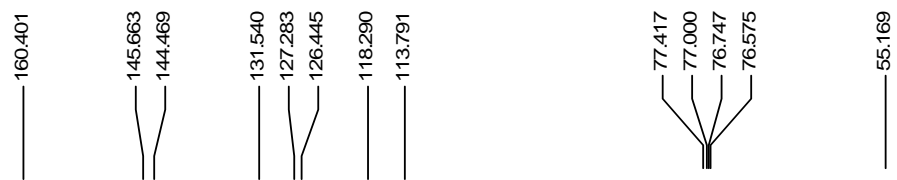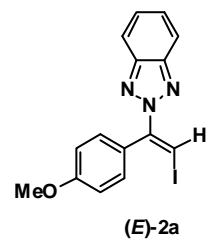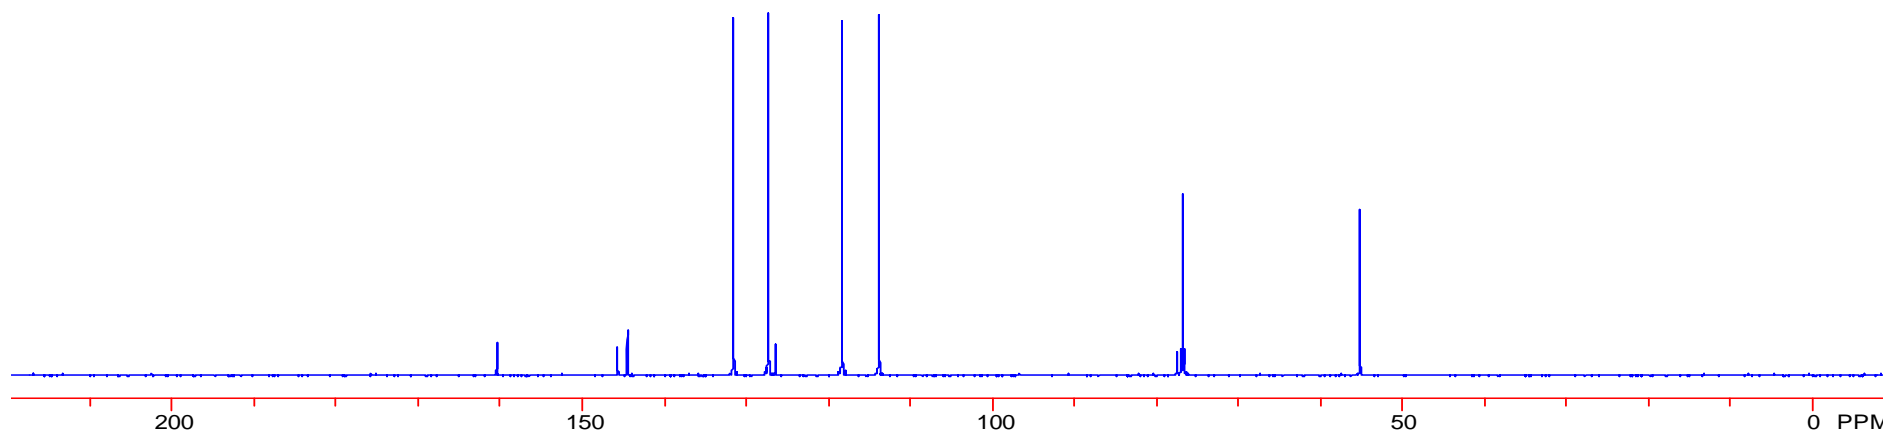

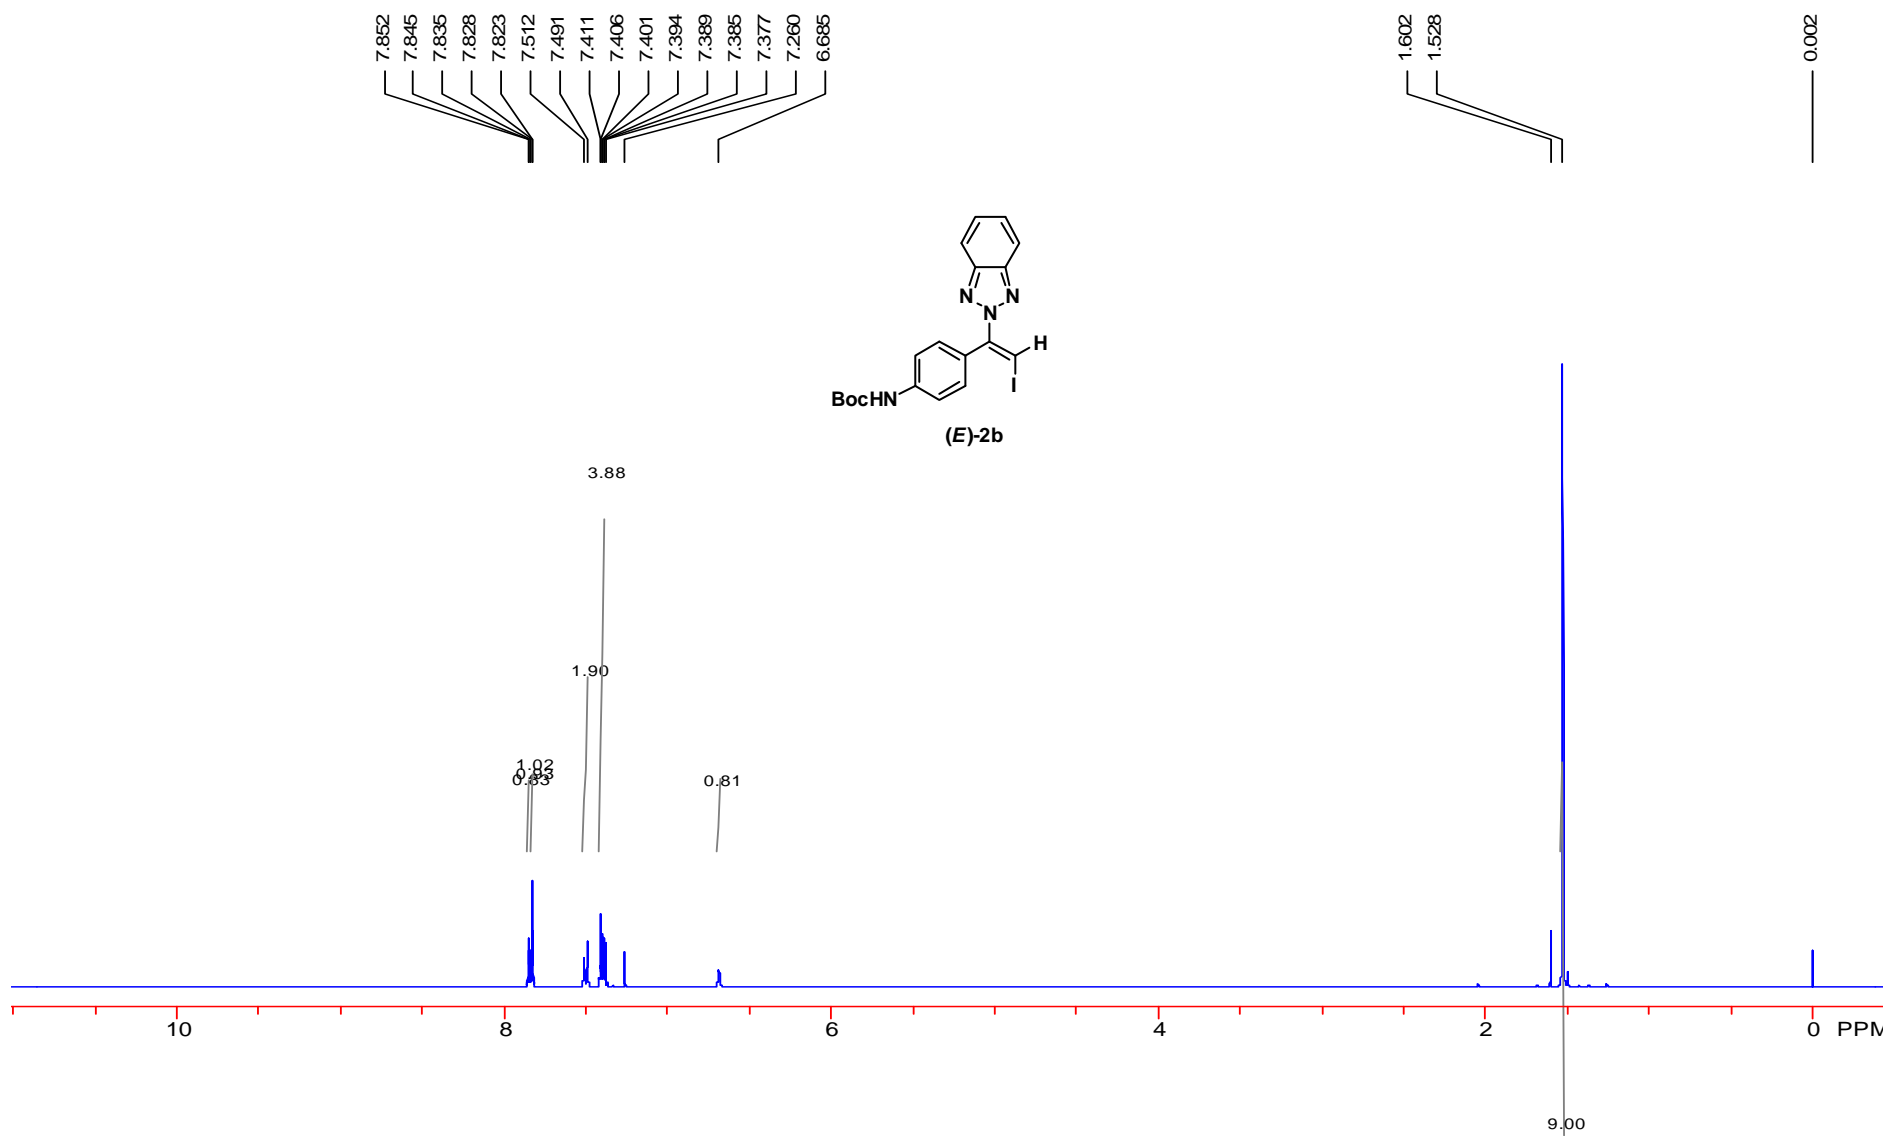

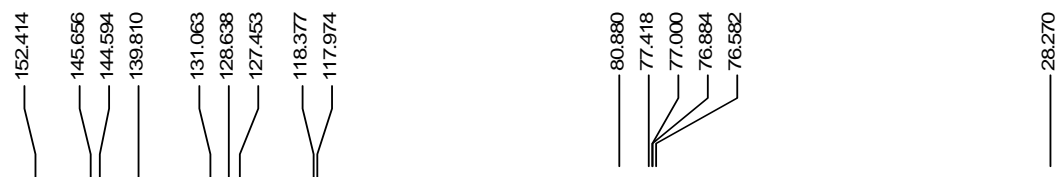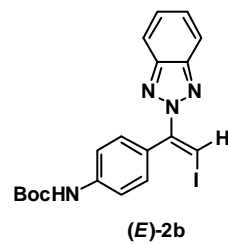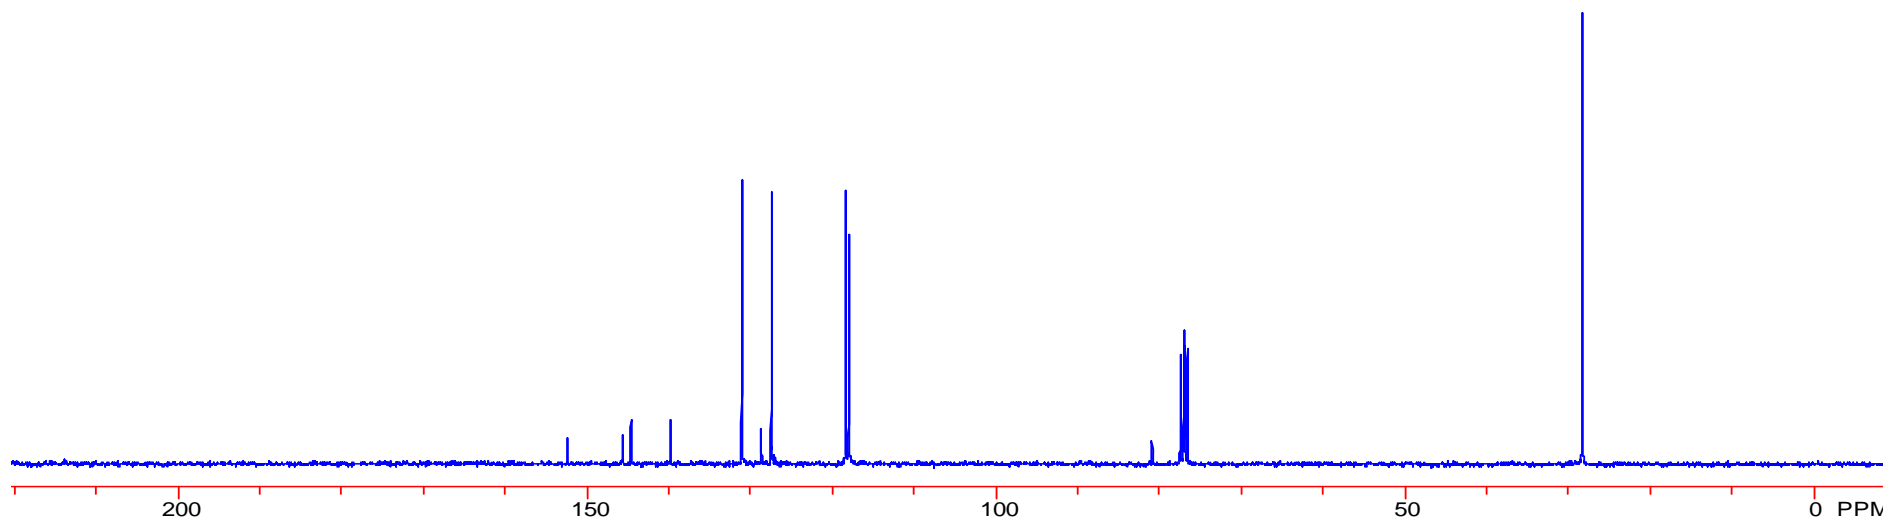

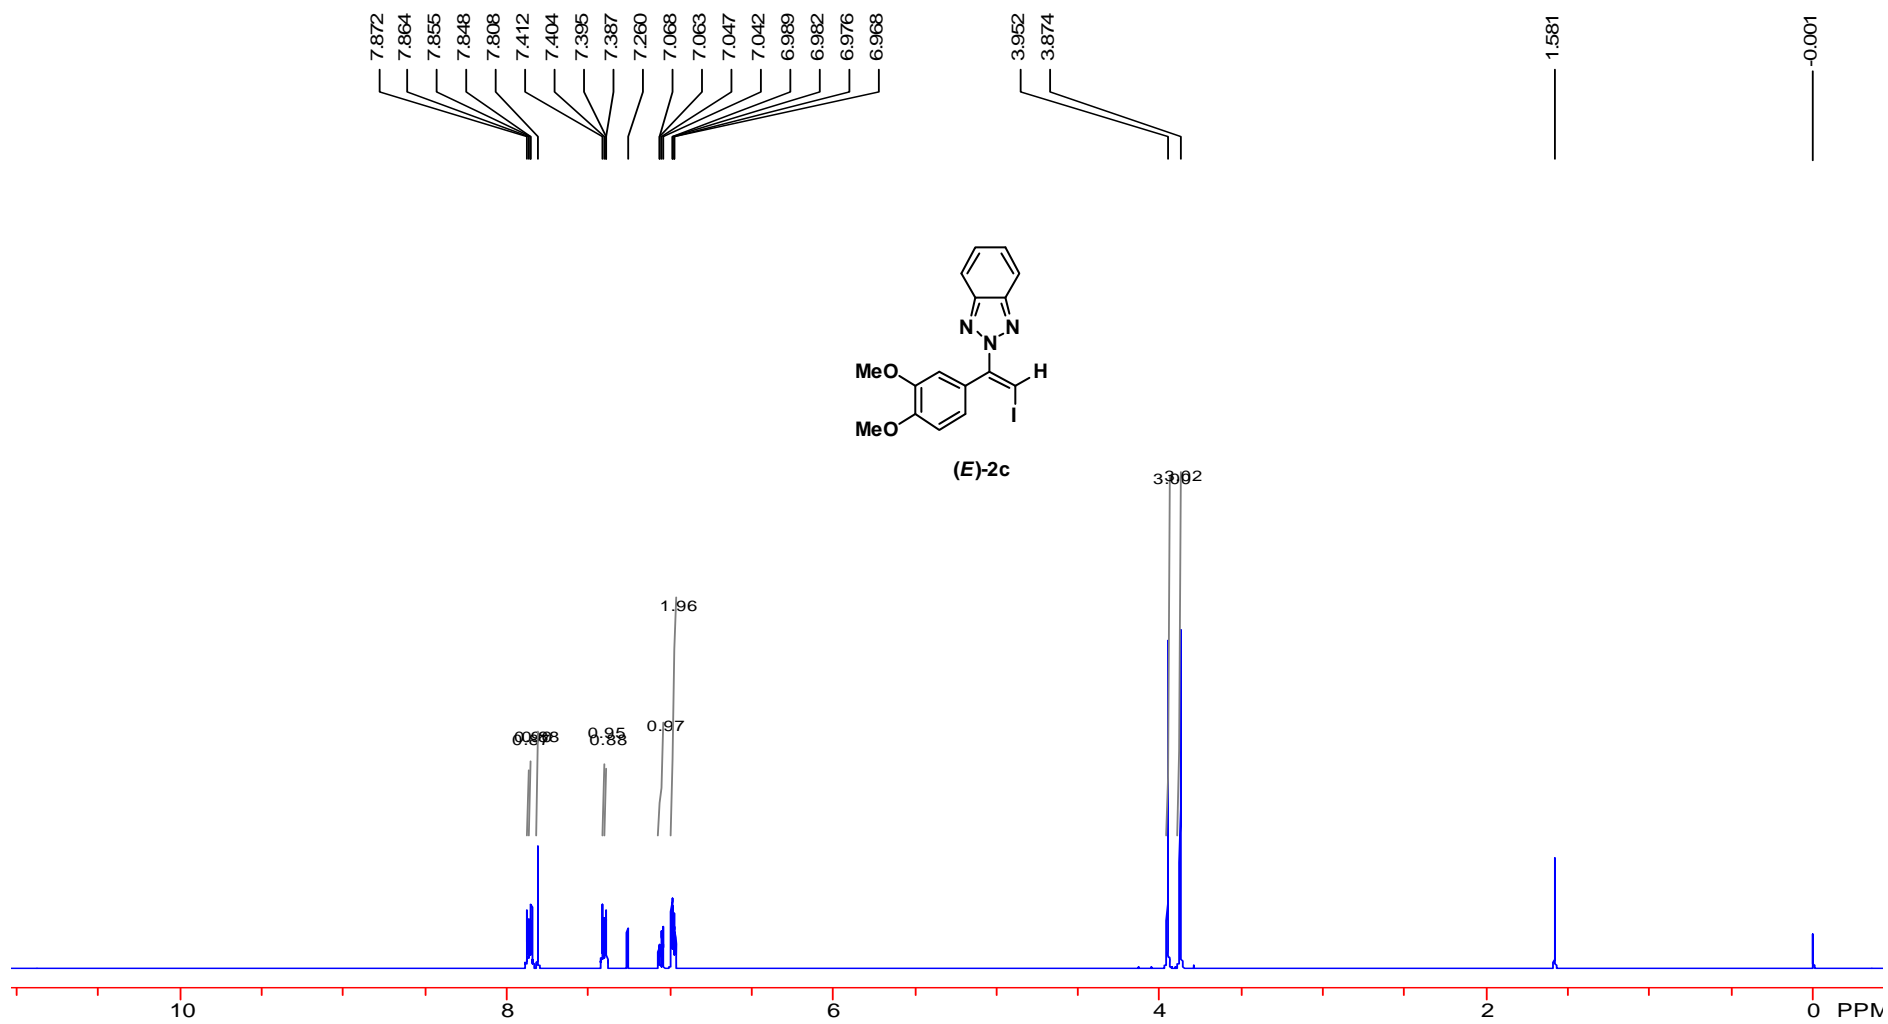

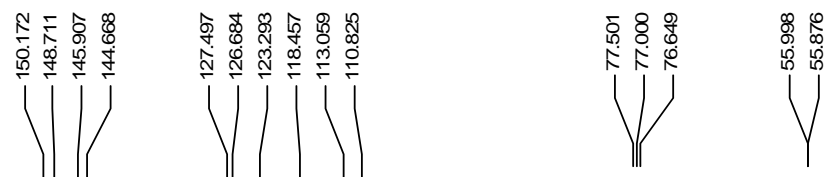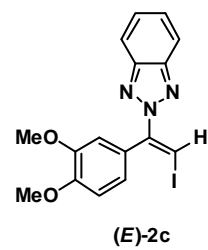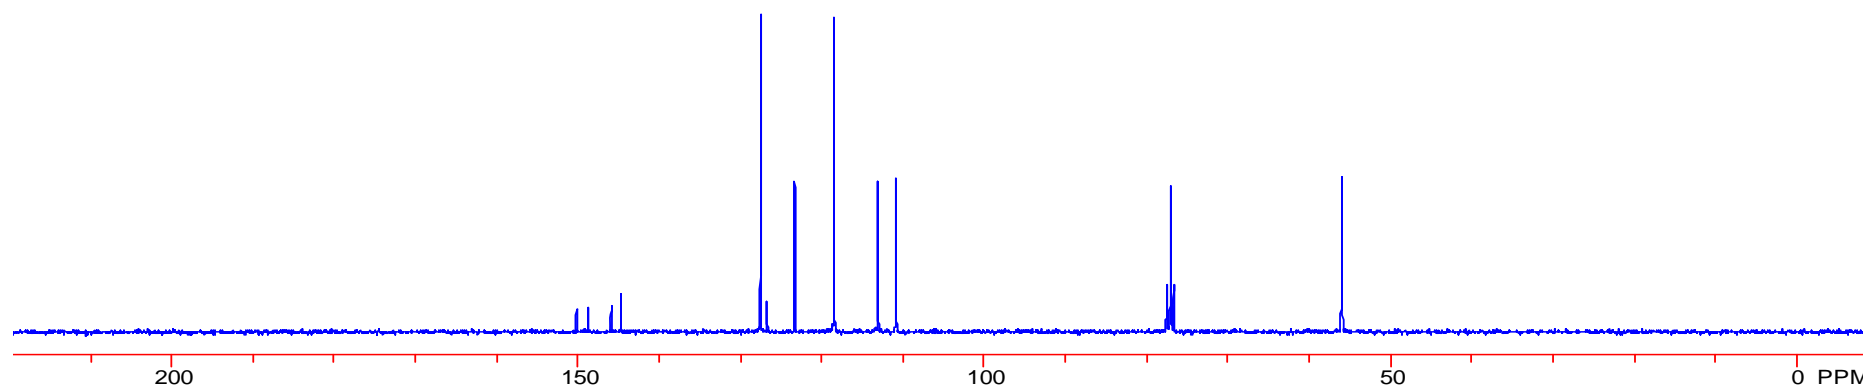

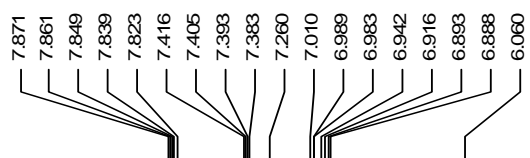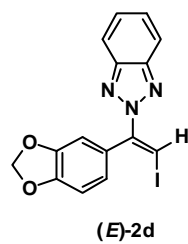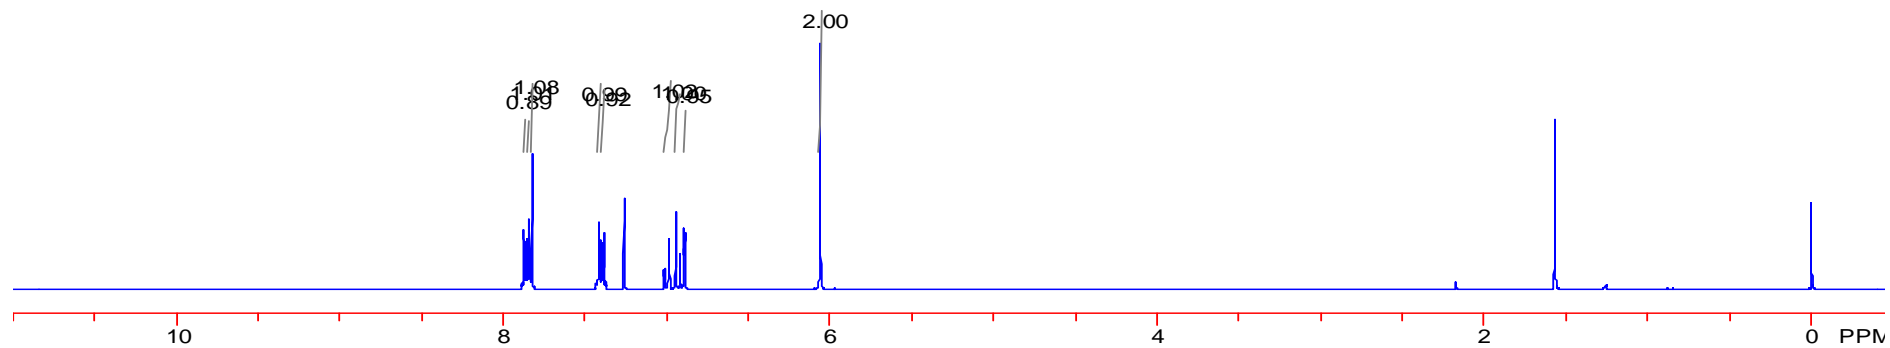



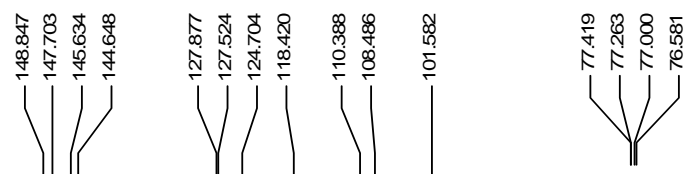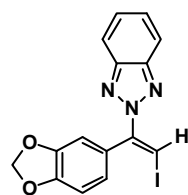

(E)-2d

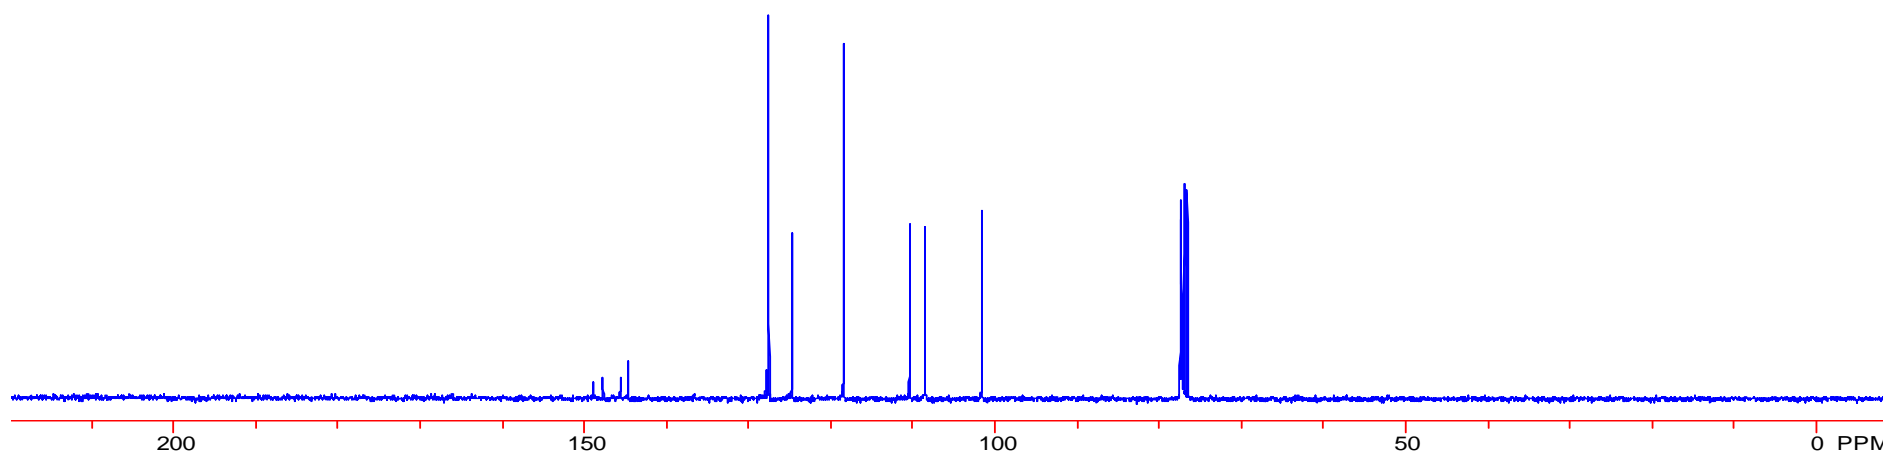

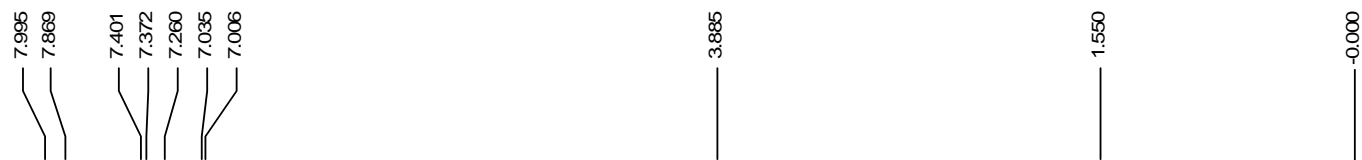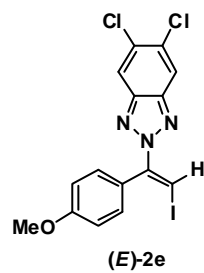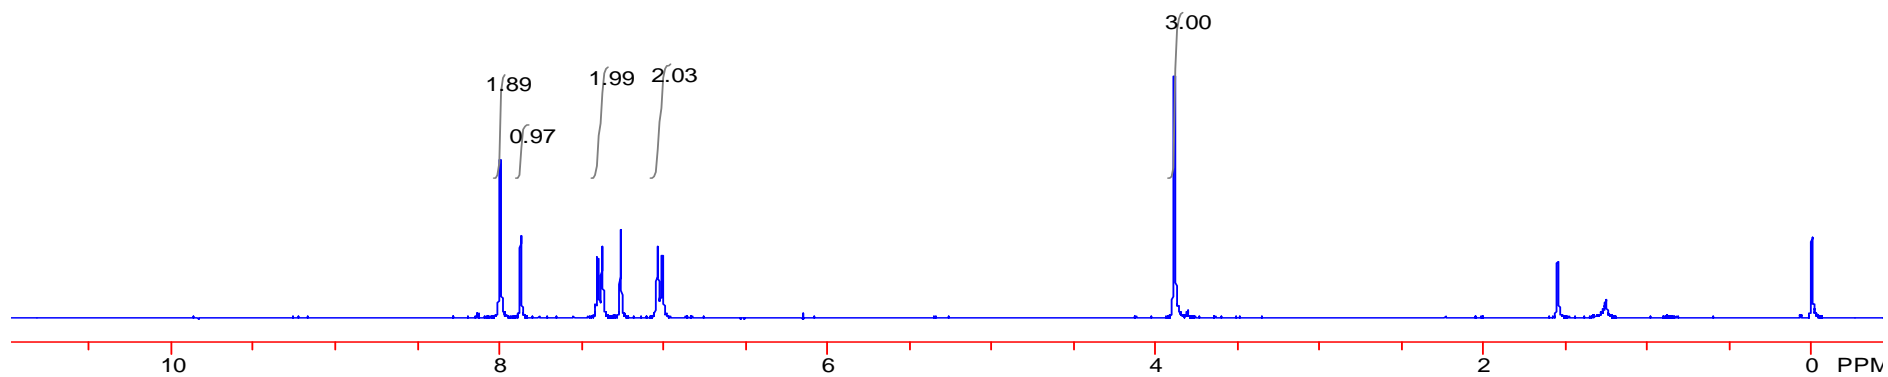

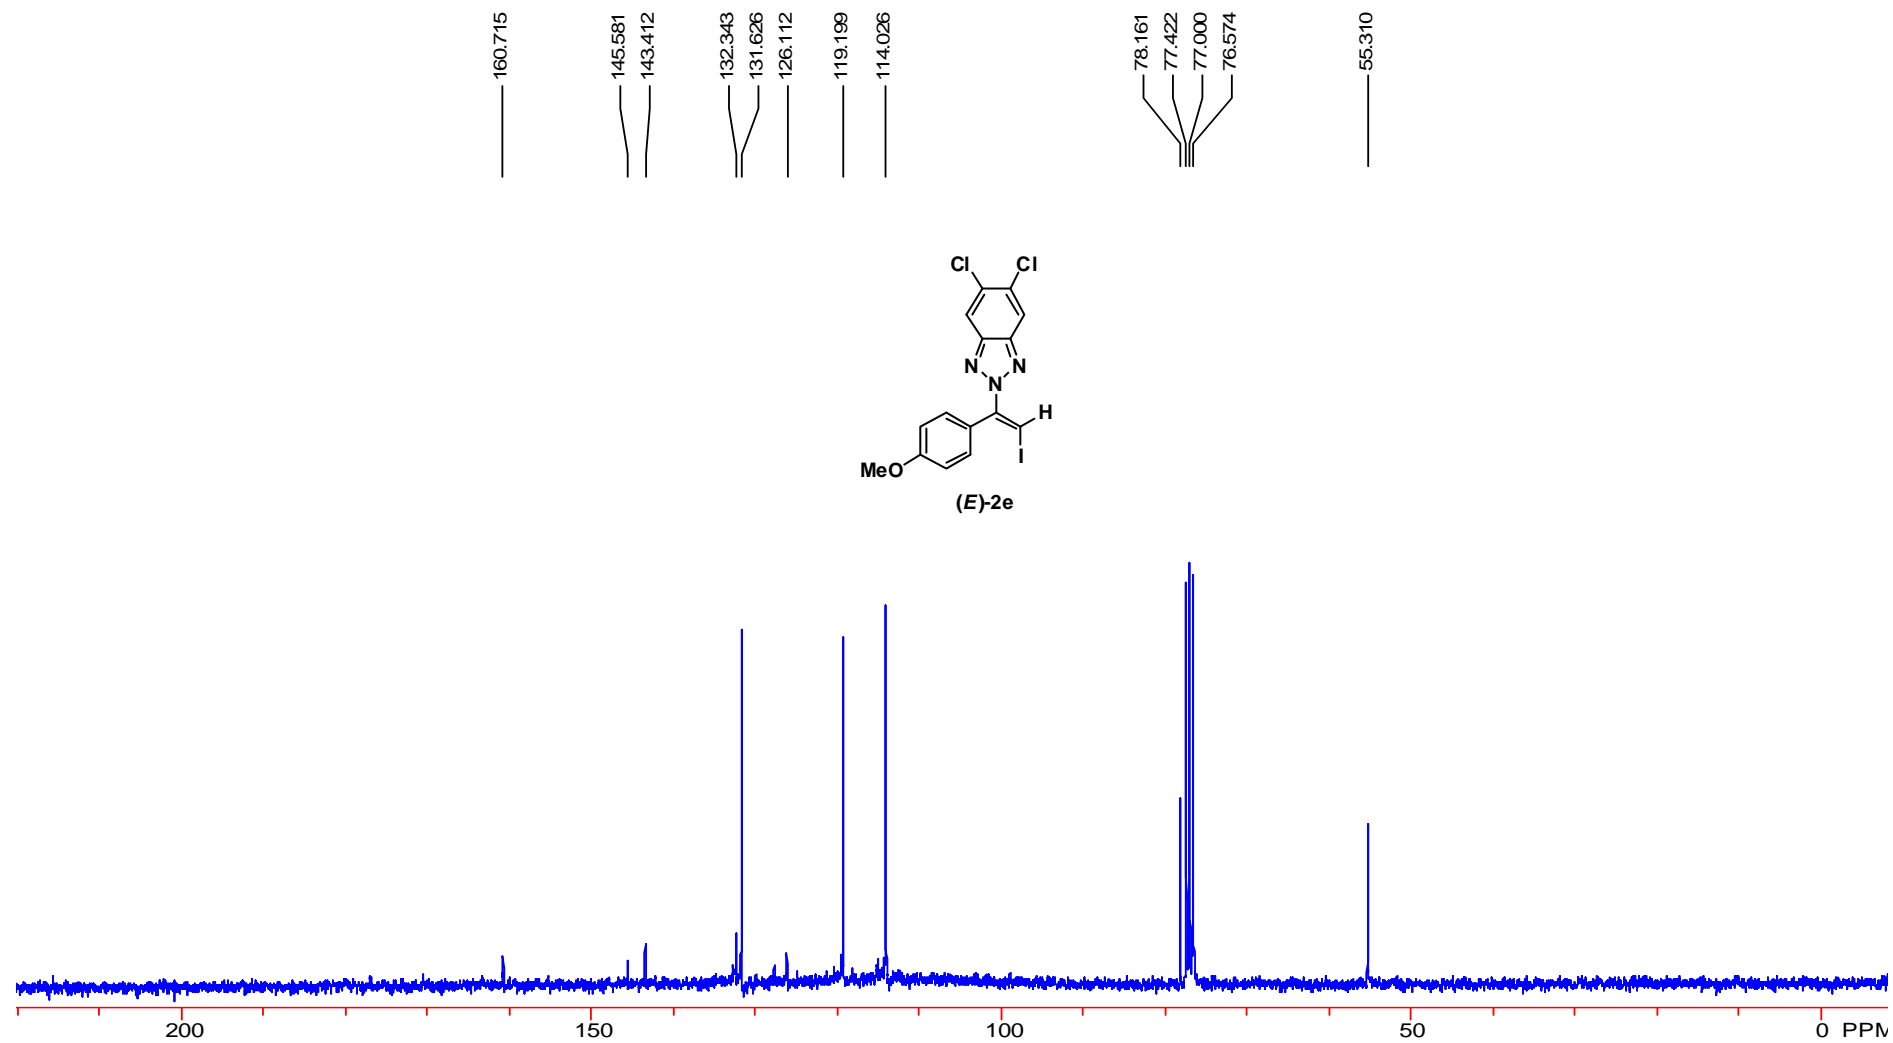

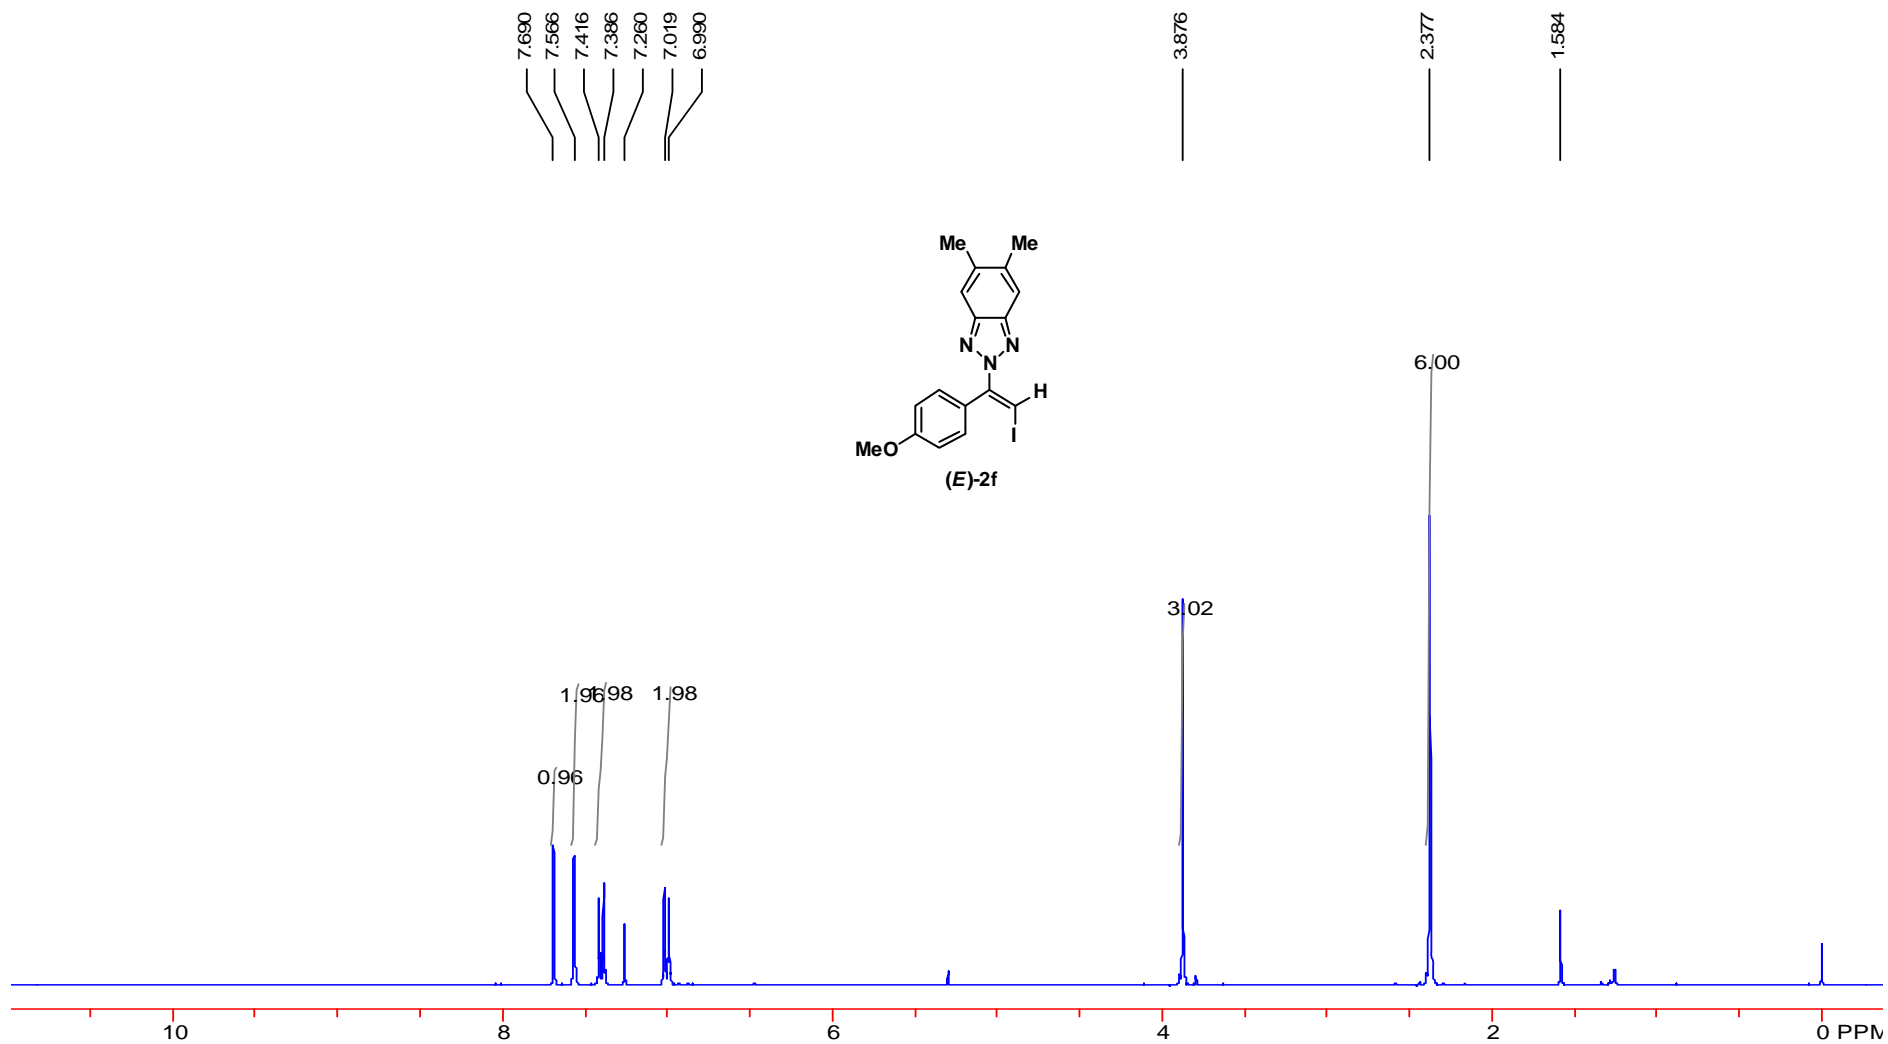

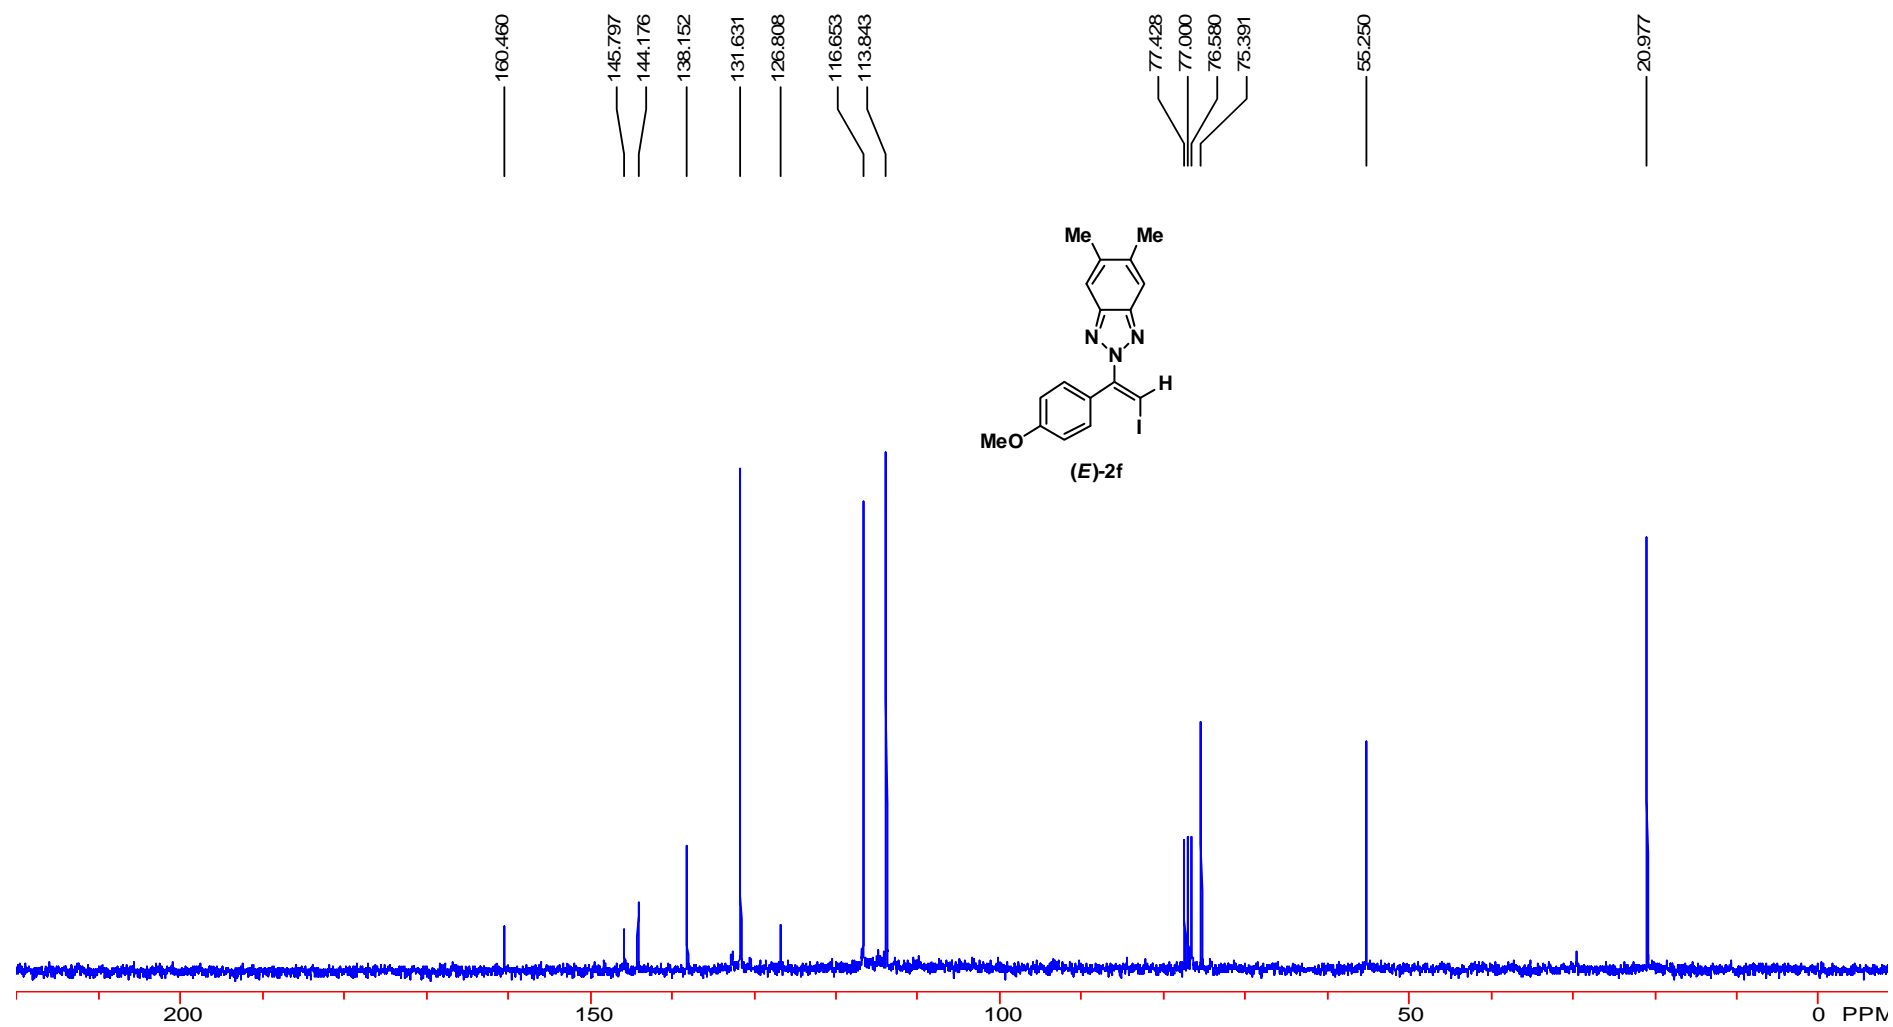

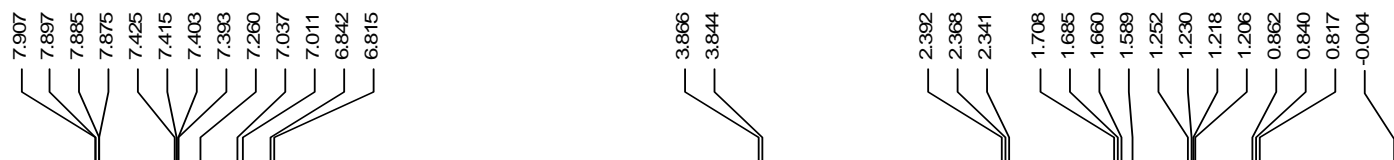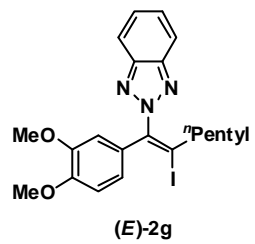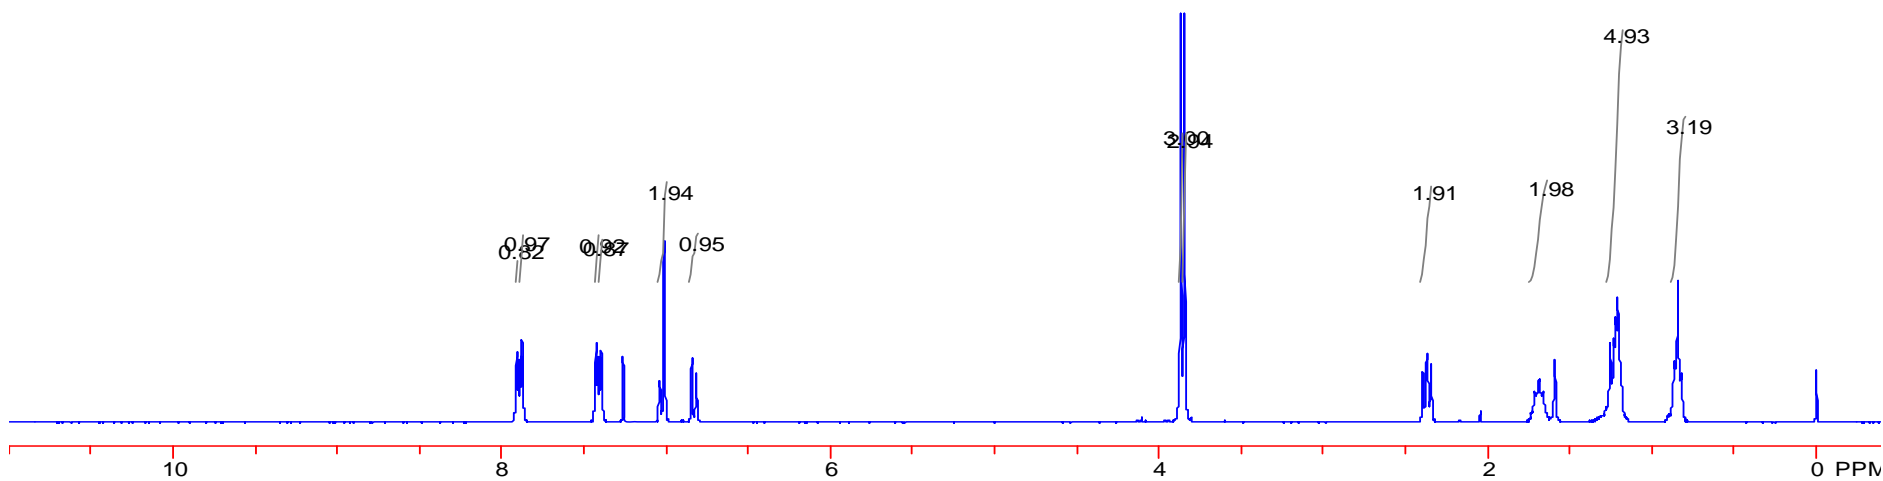

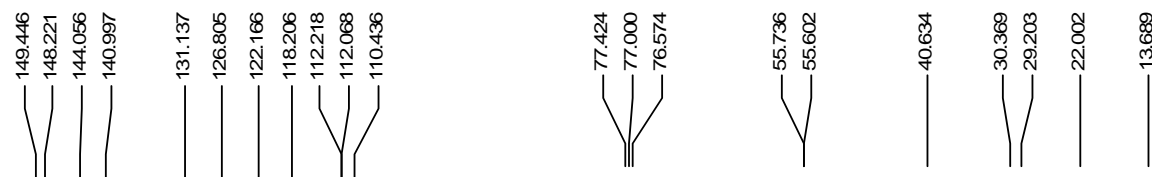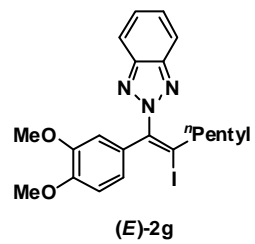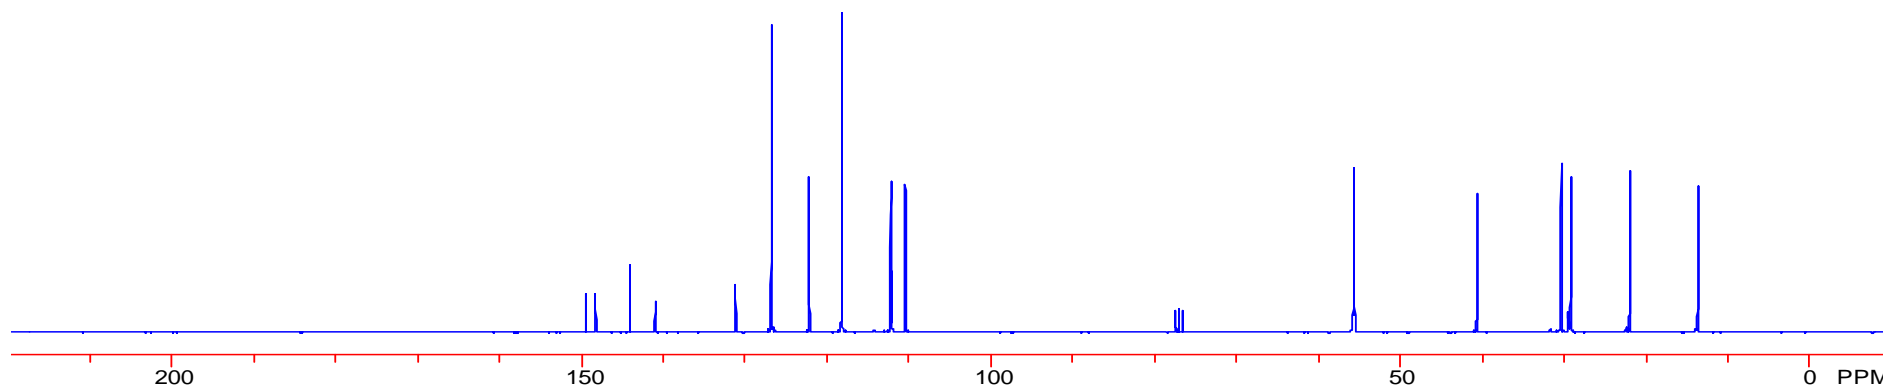

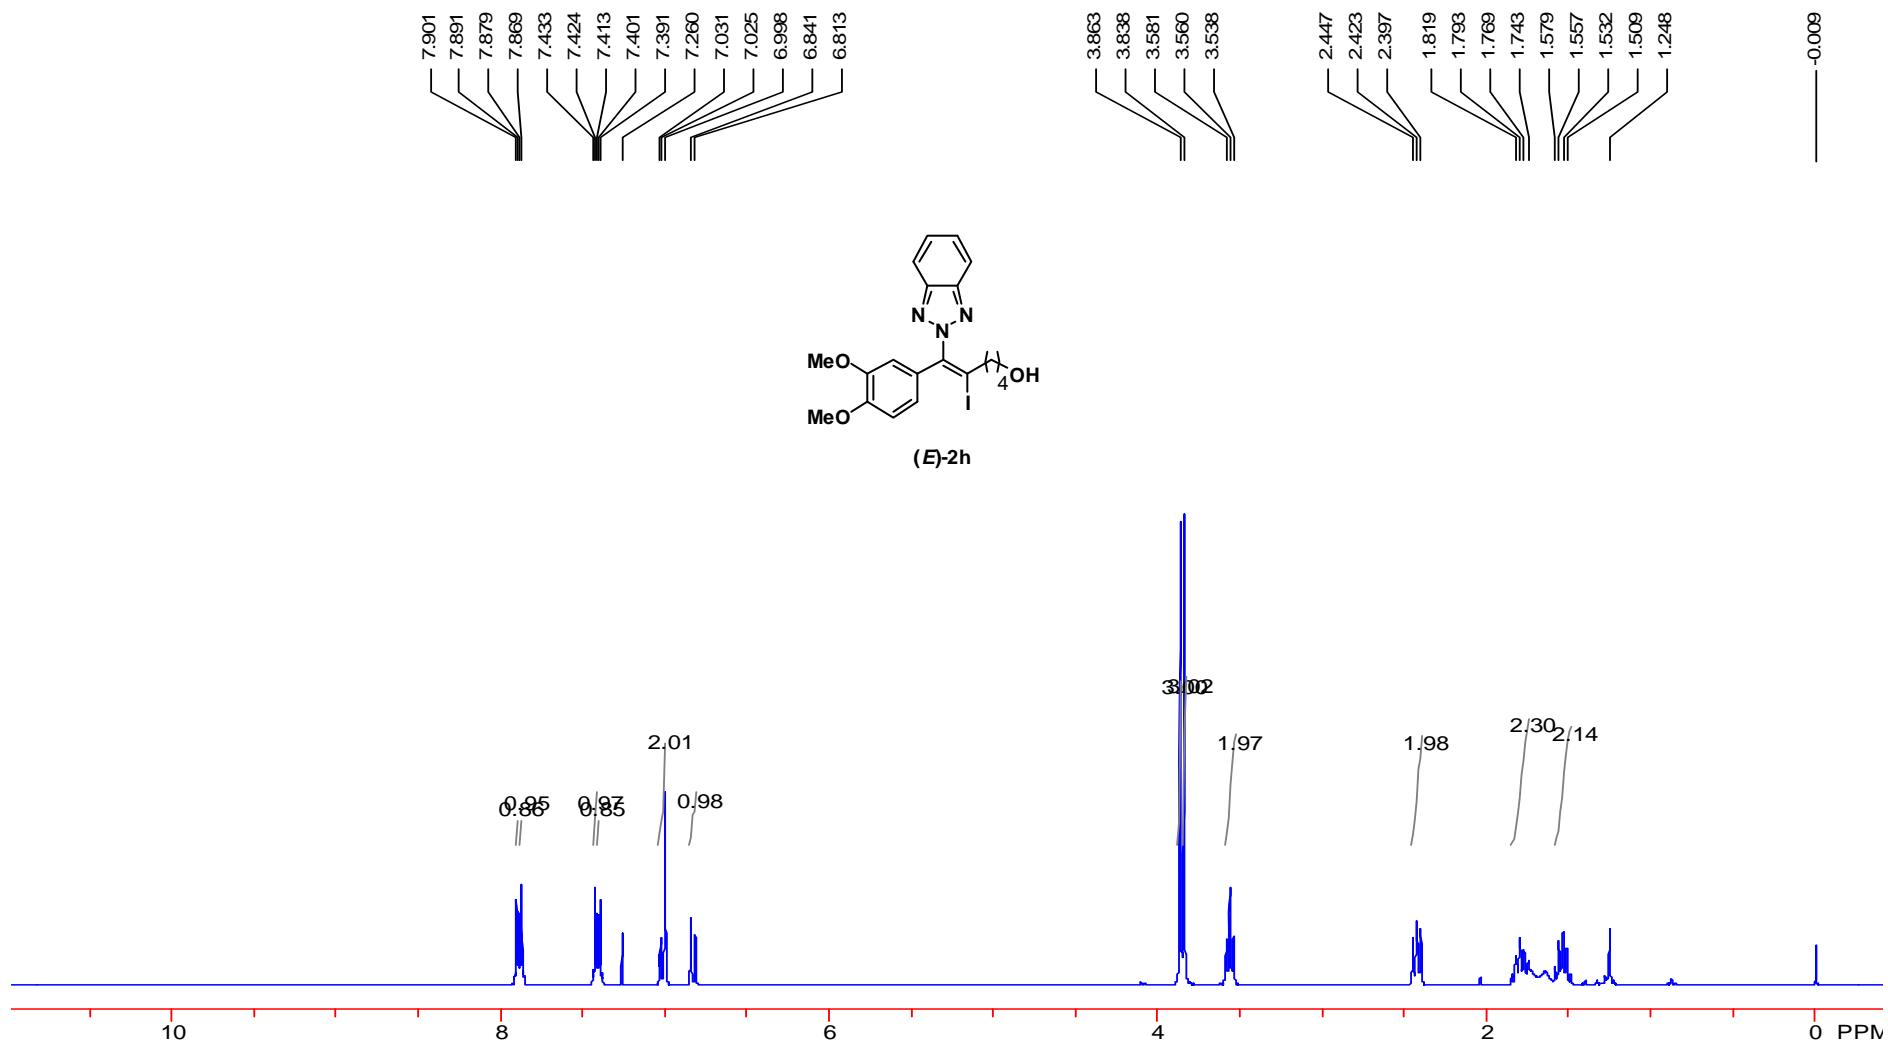



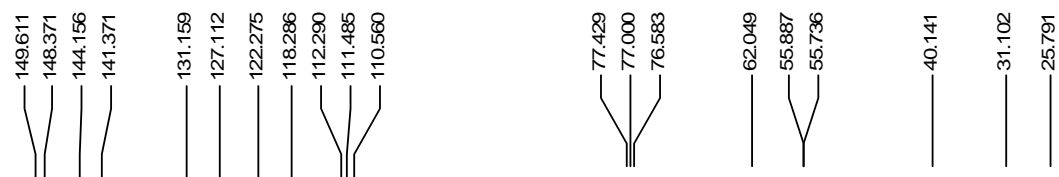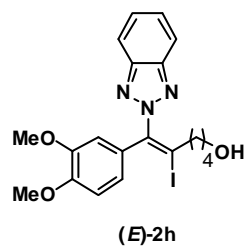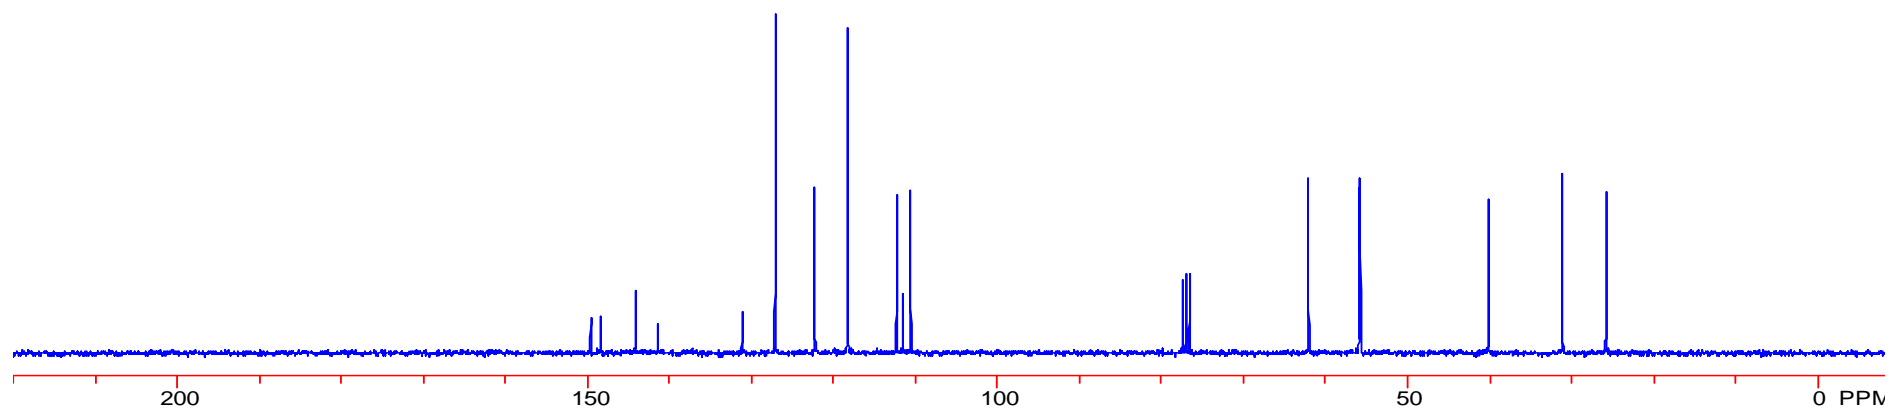

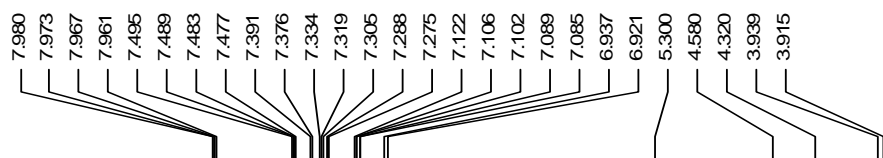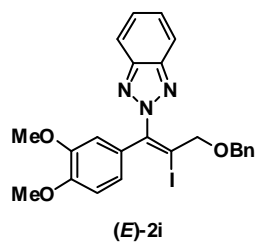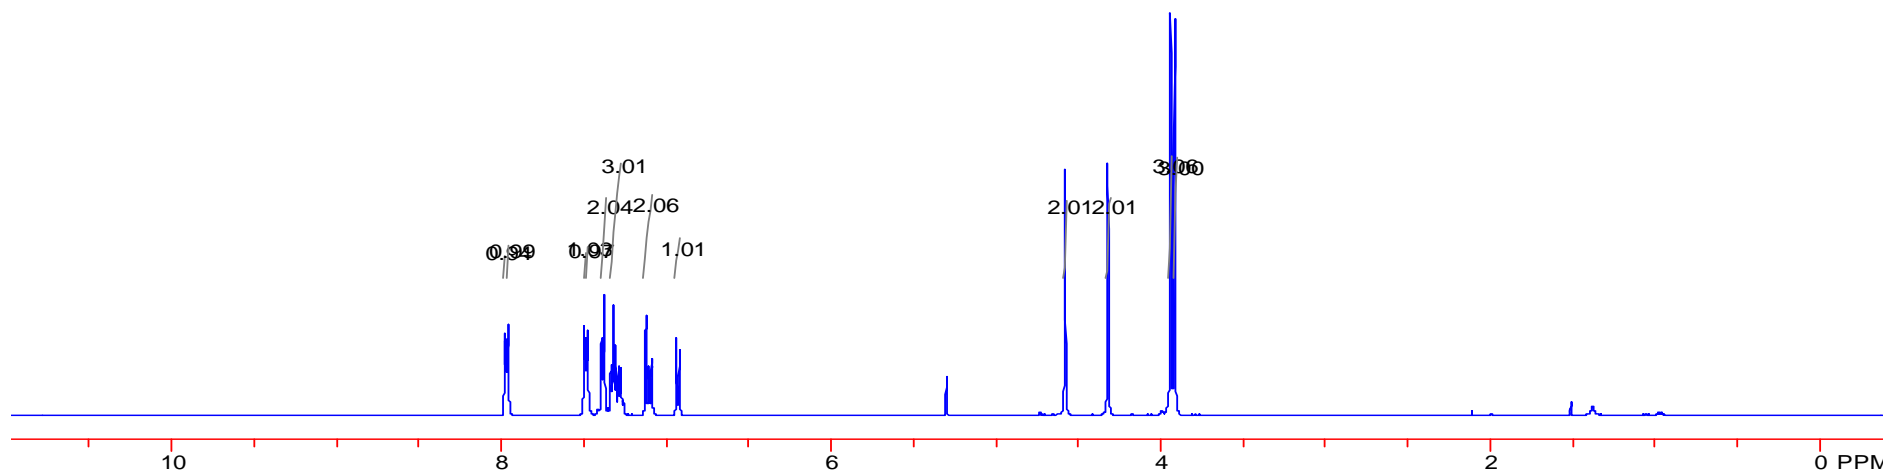

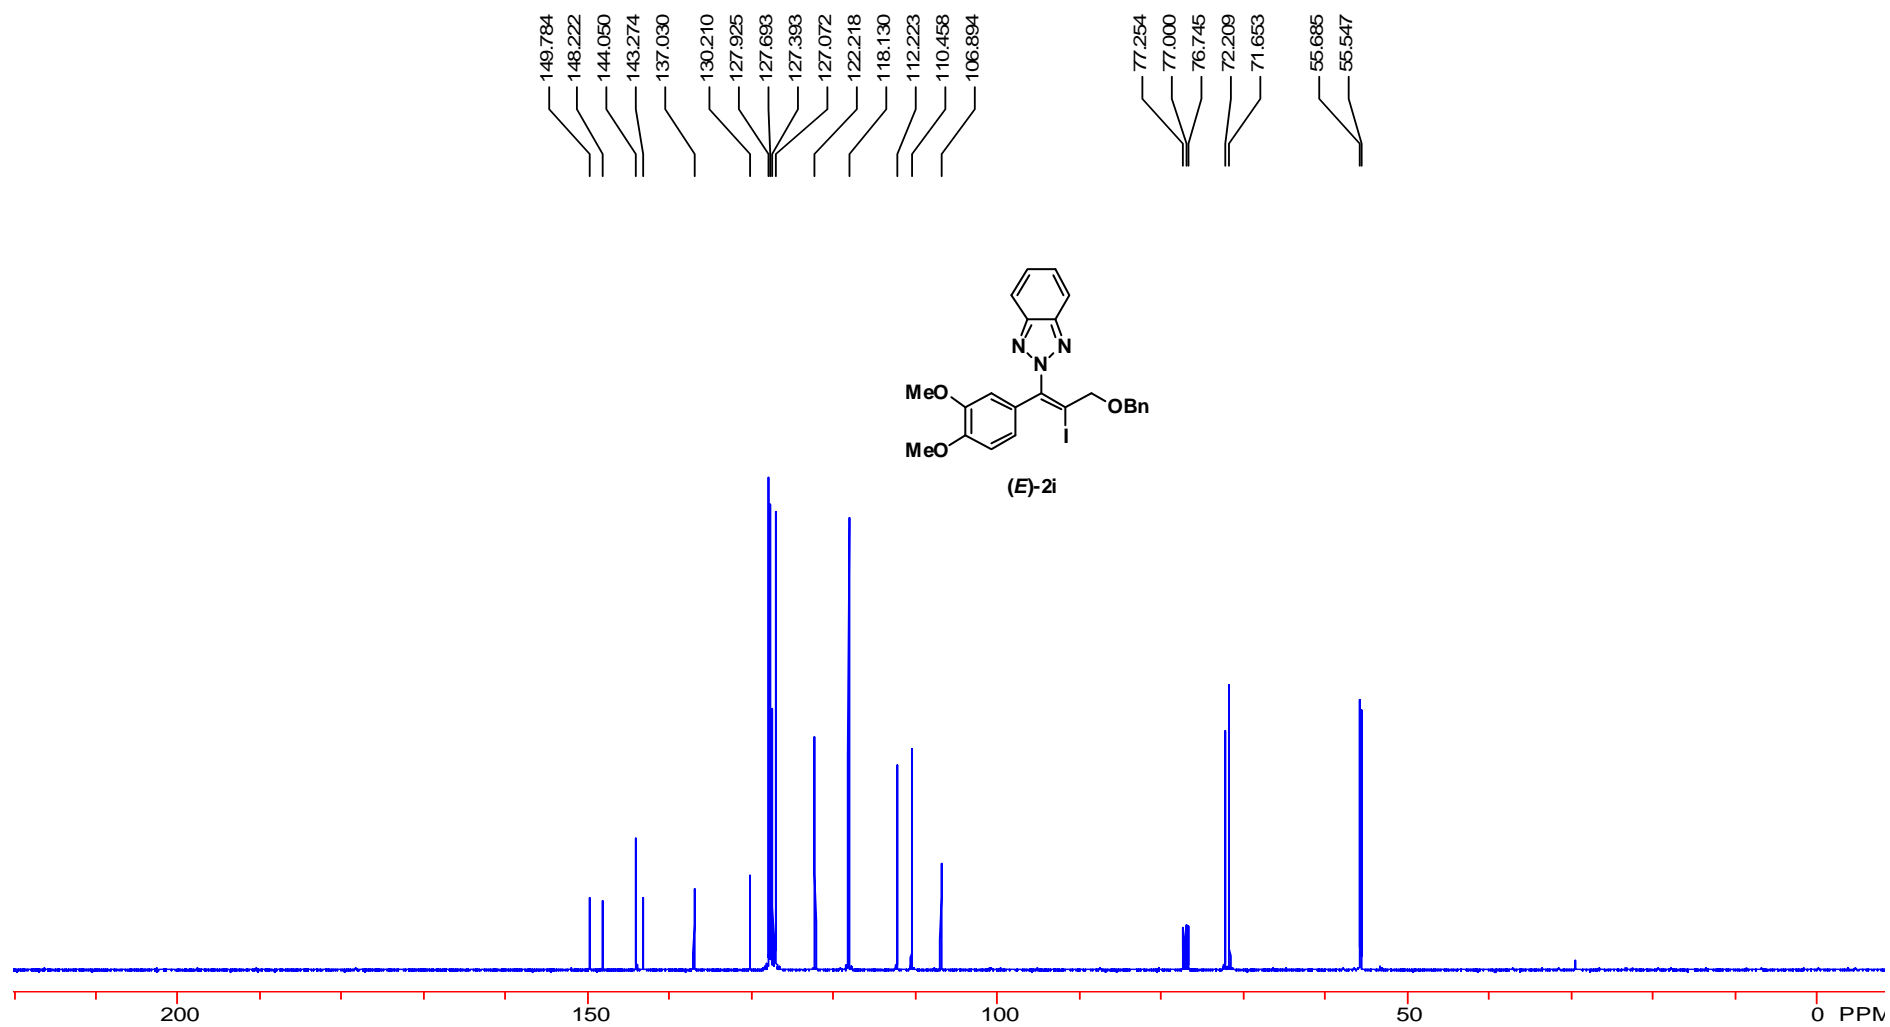

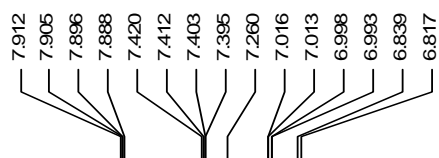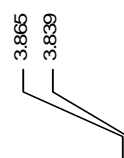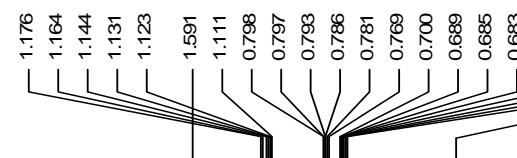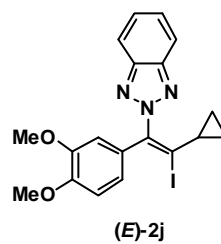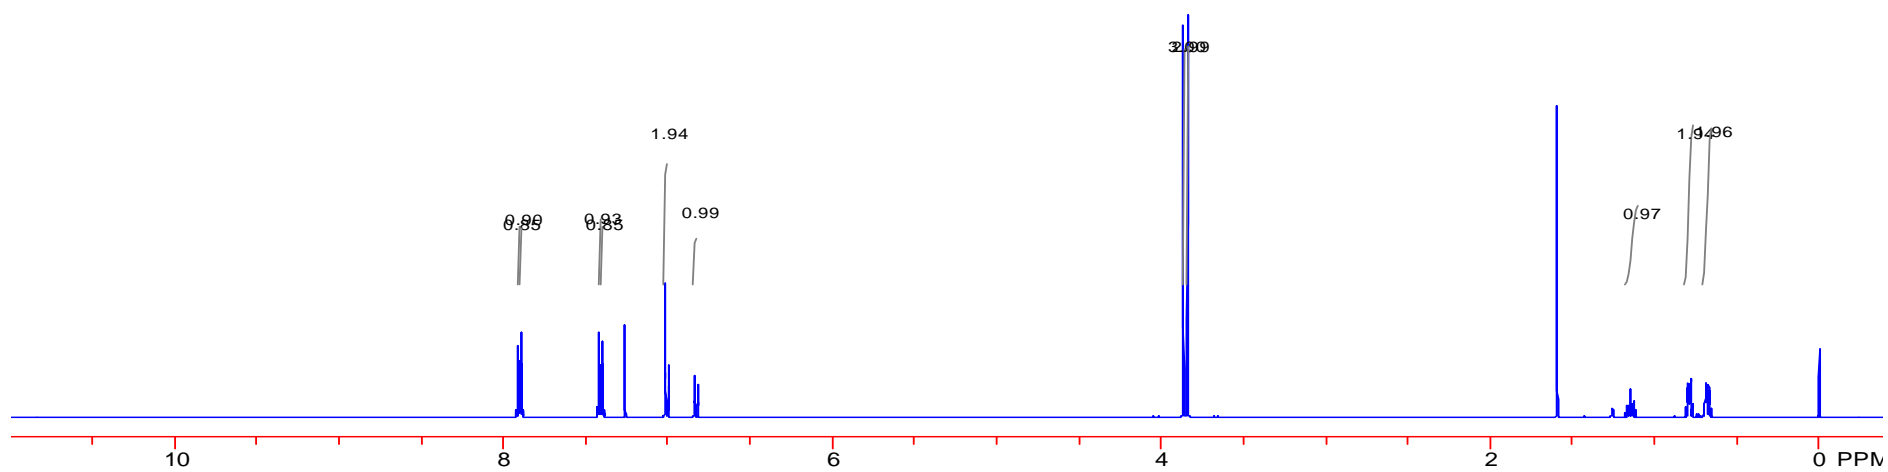

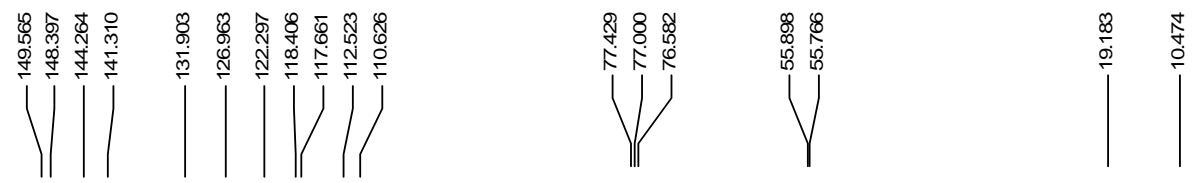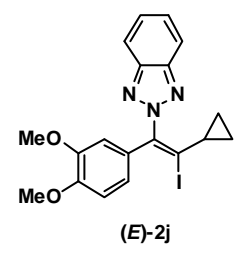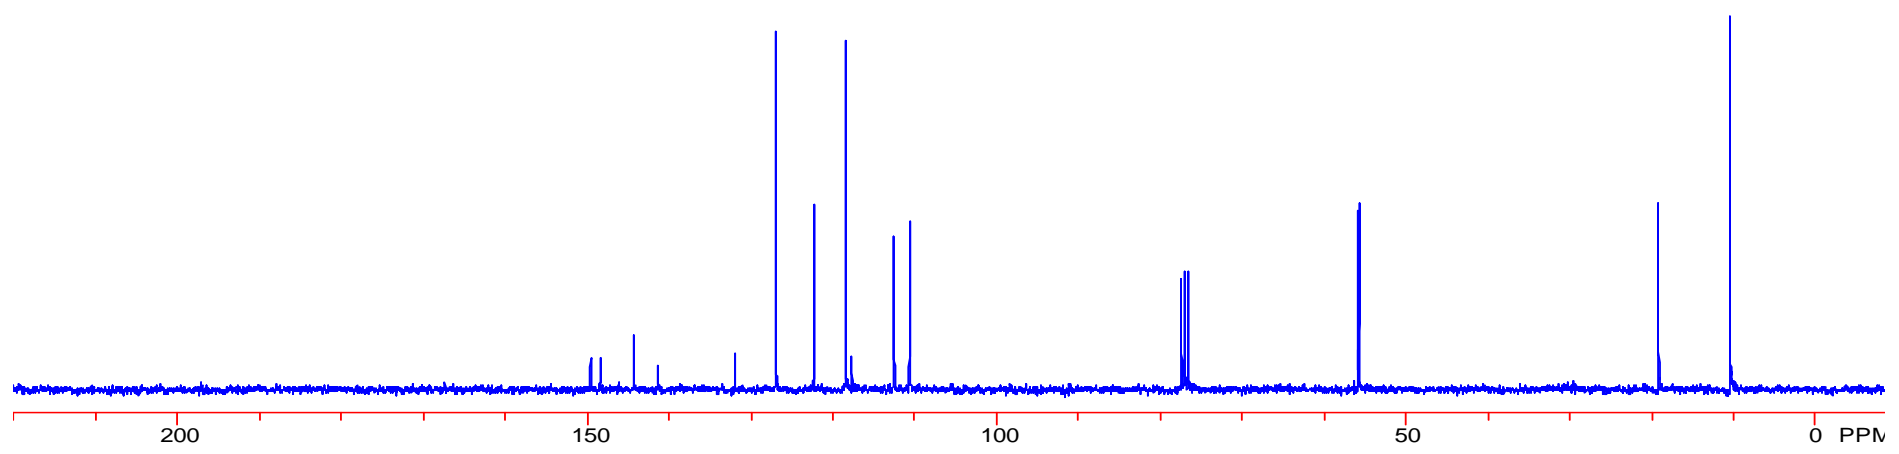

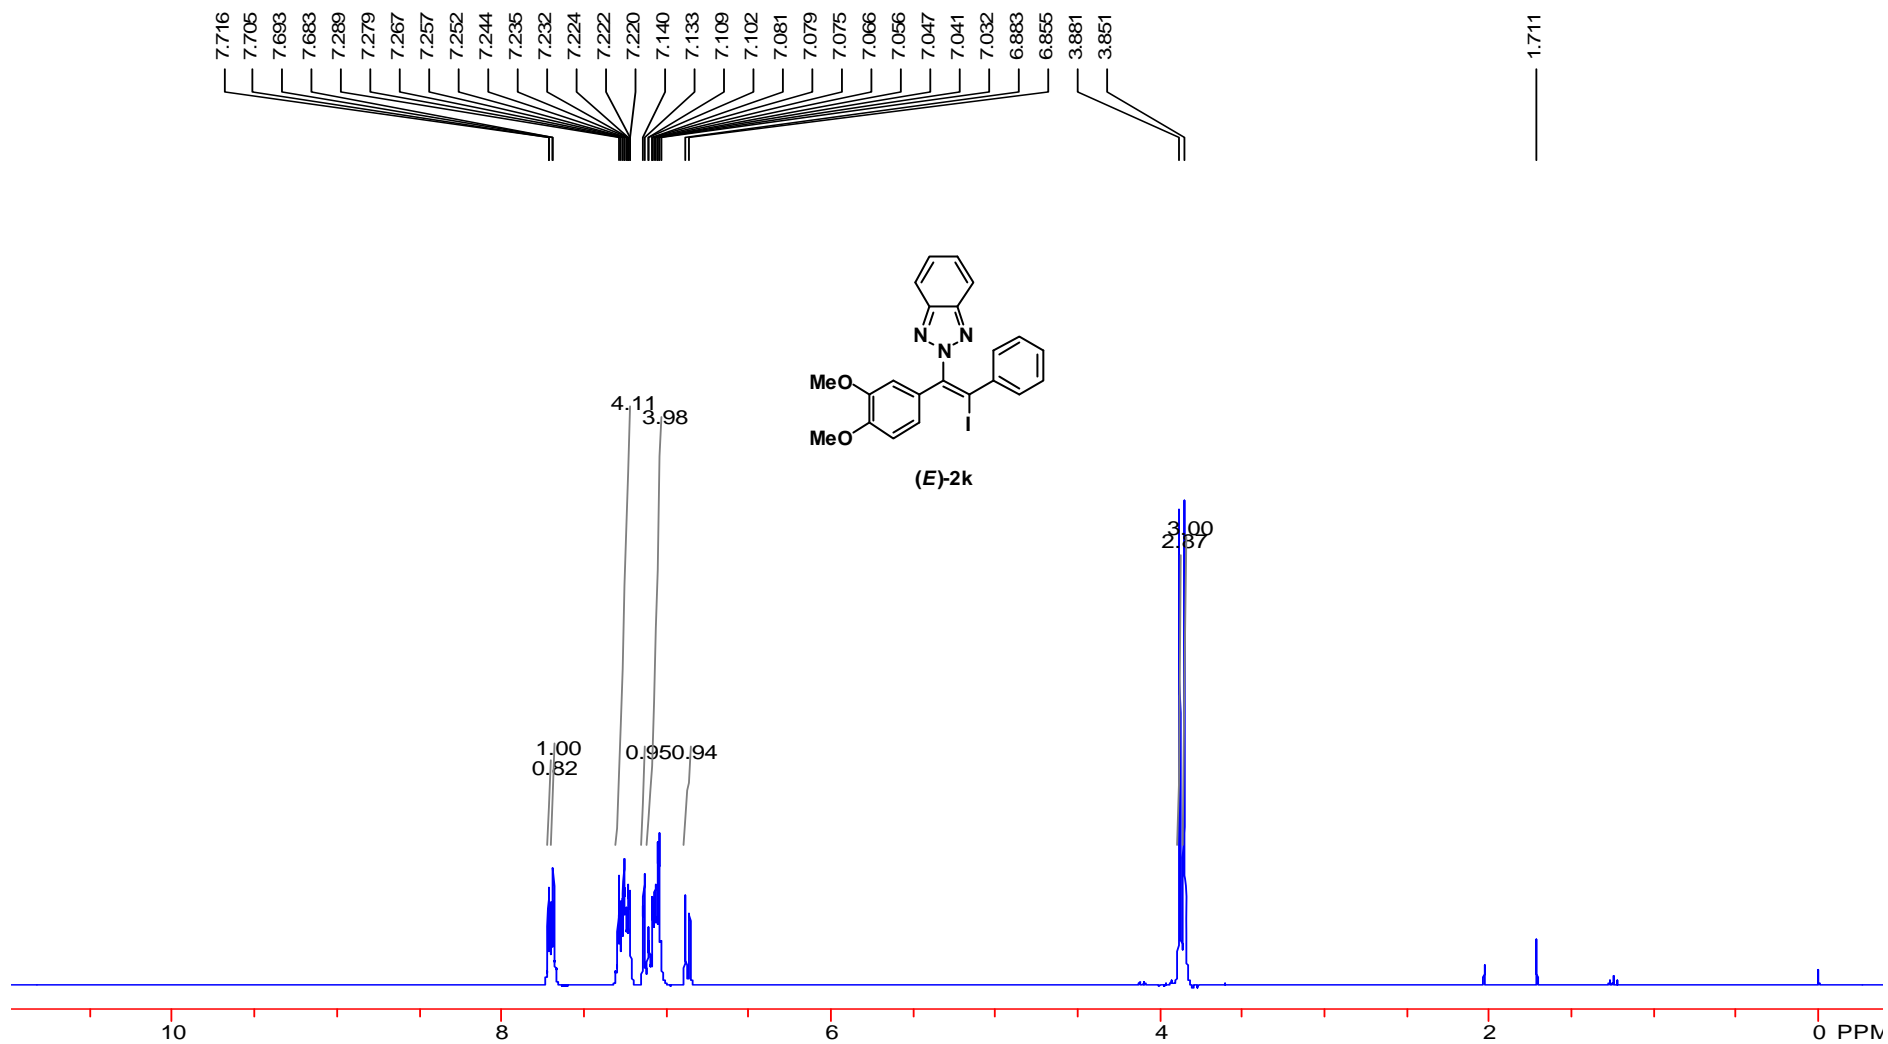

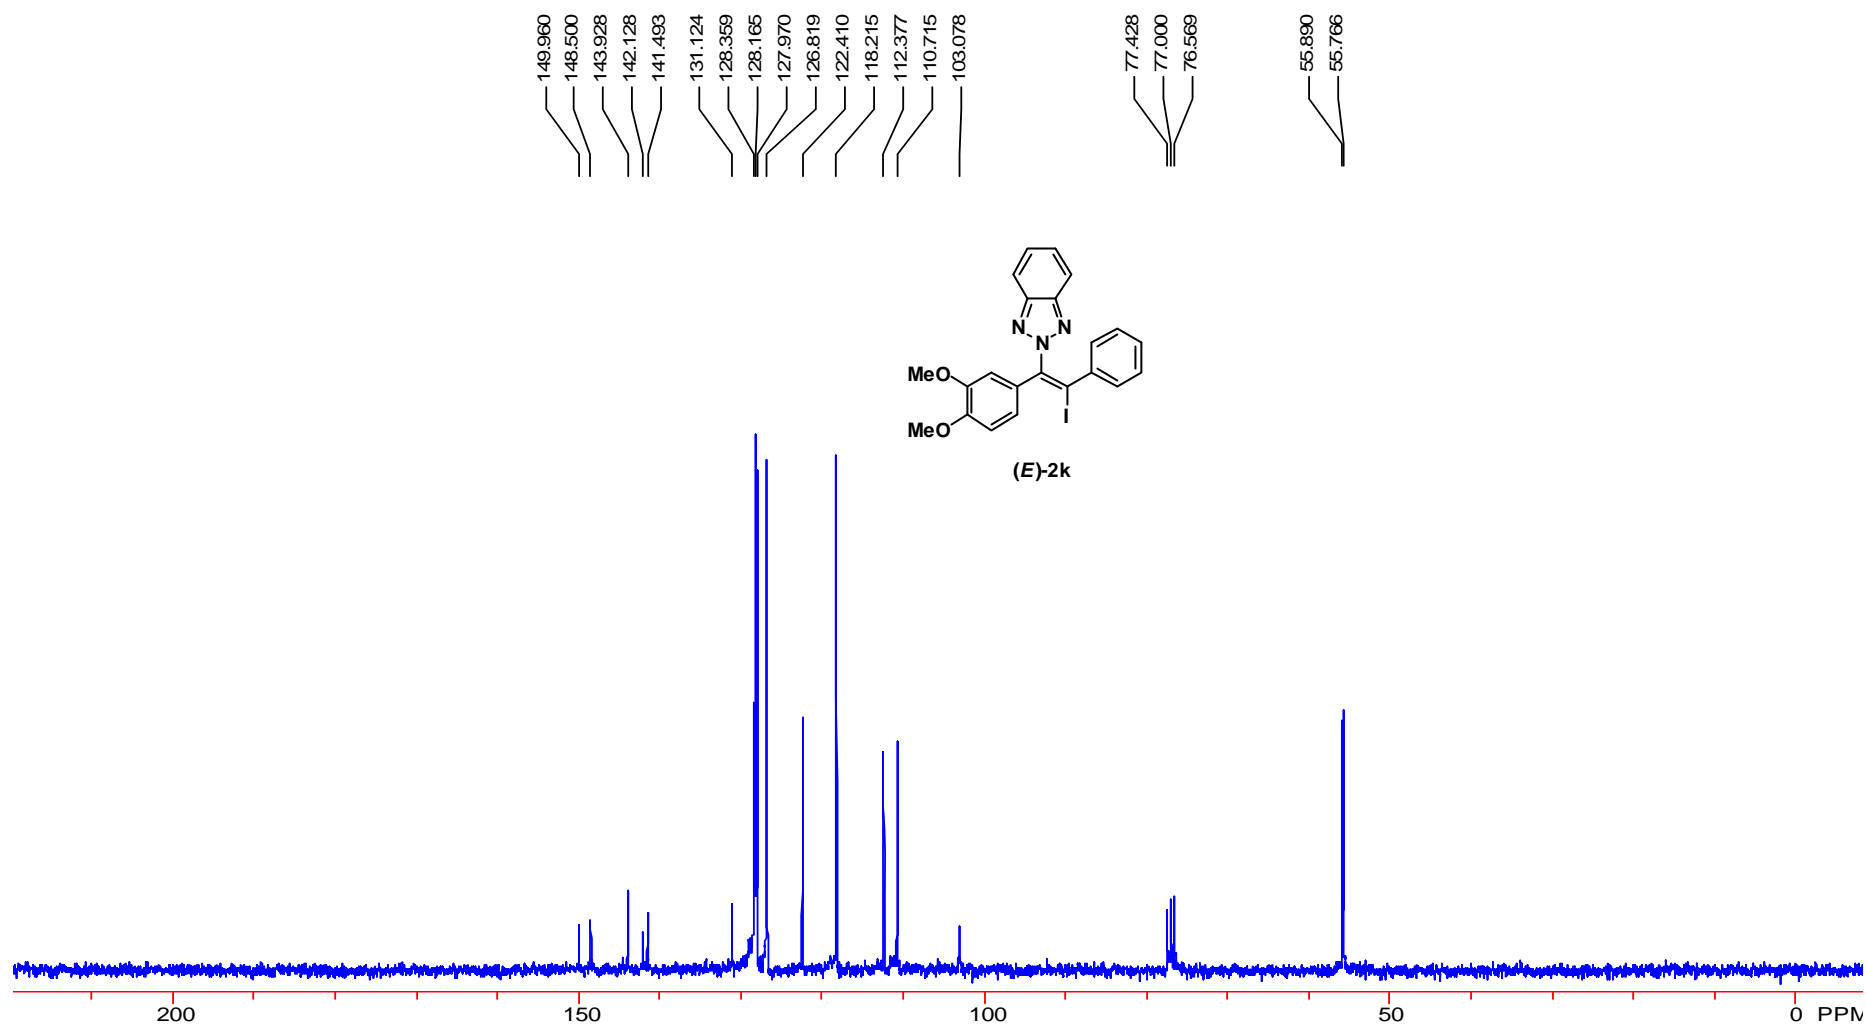

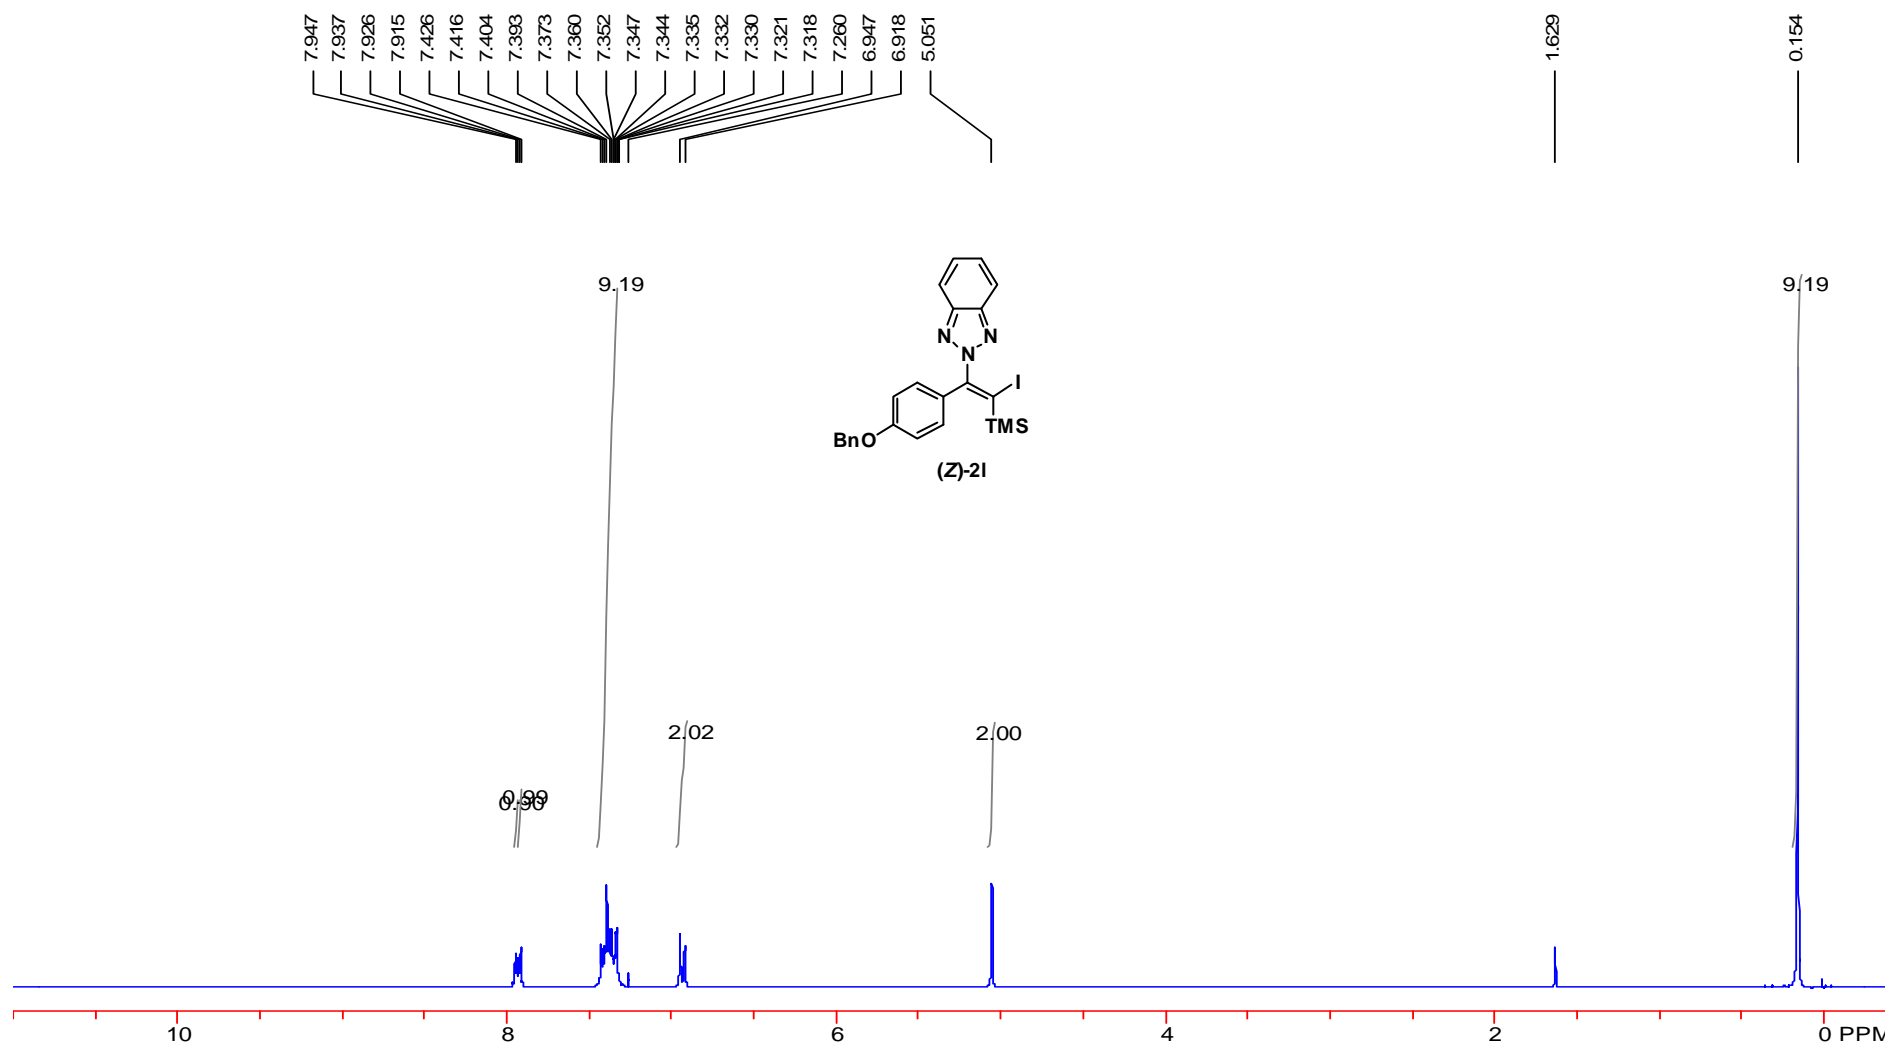



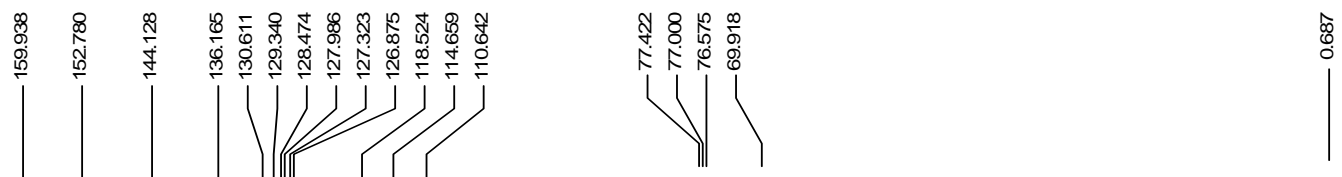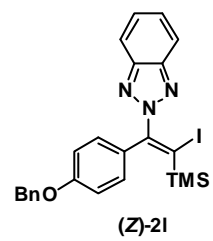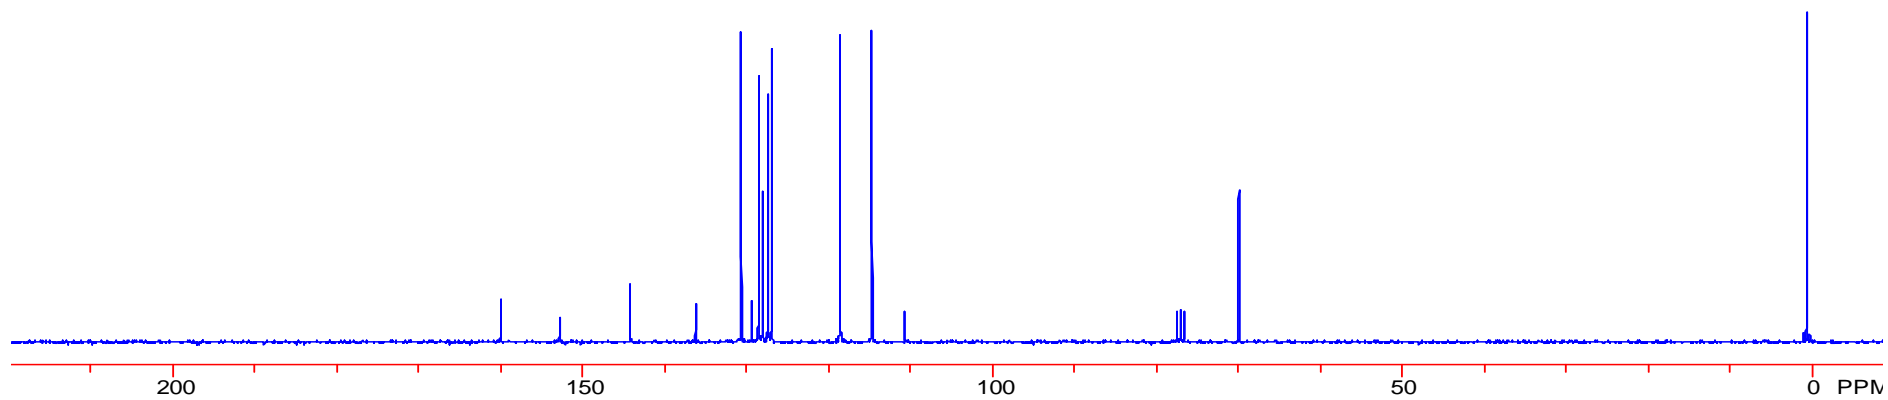

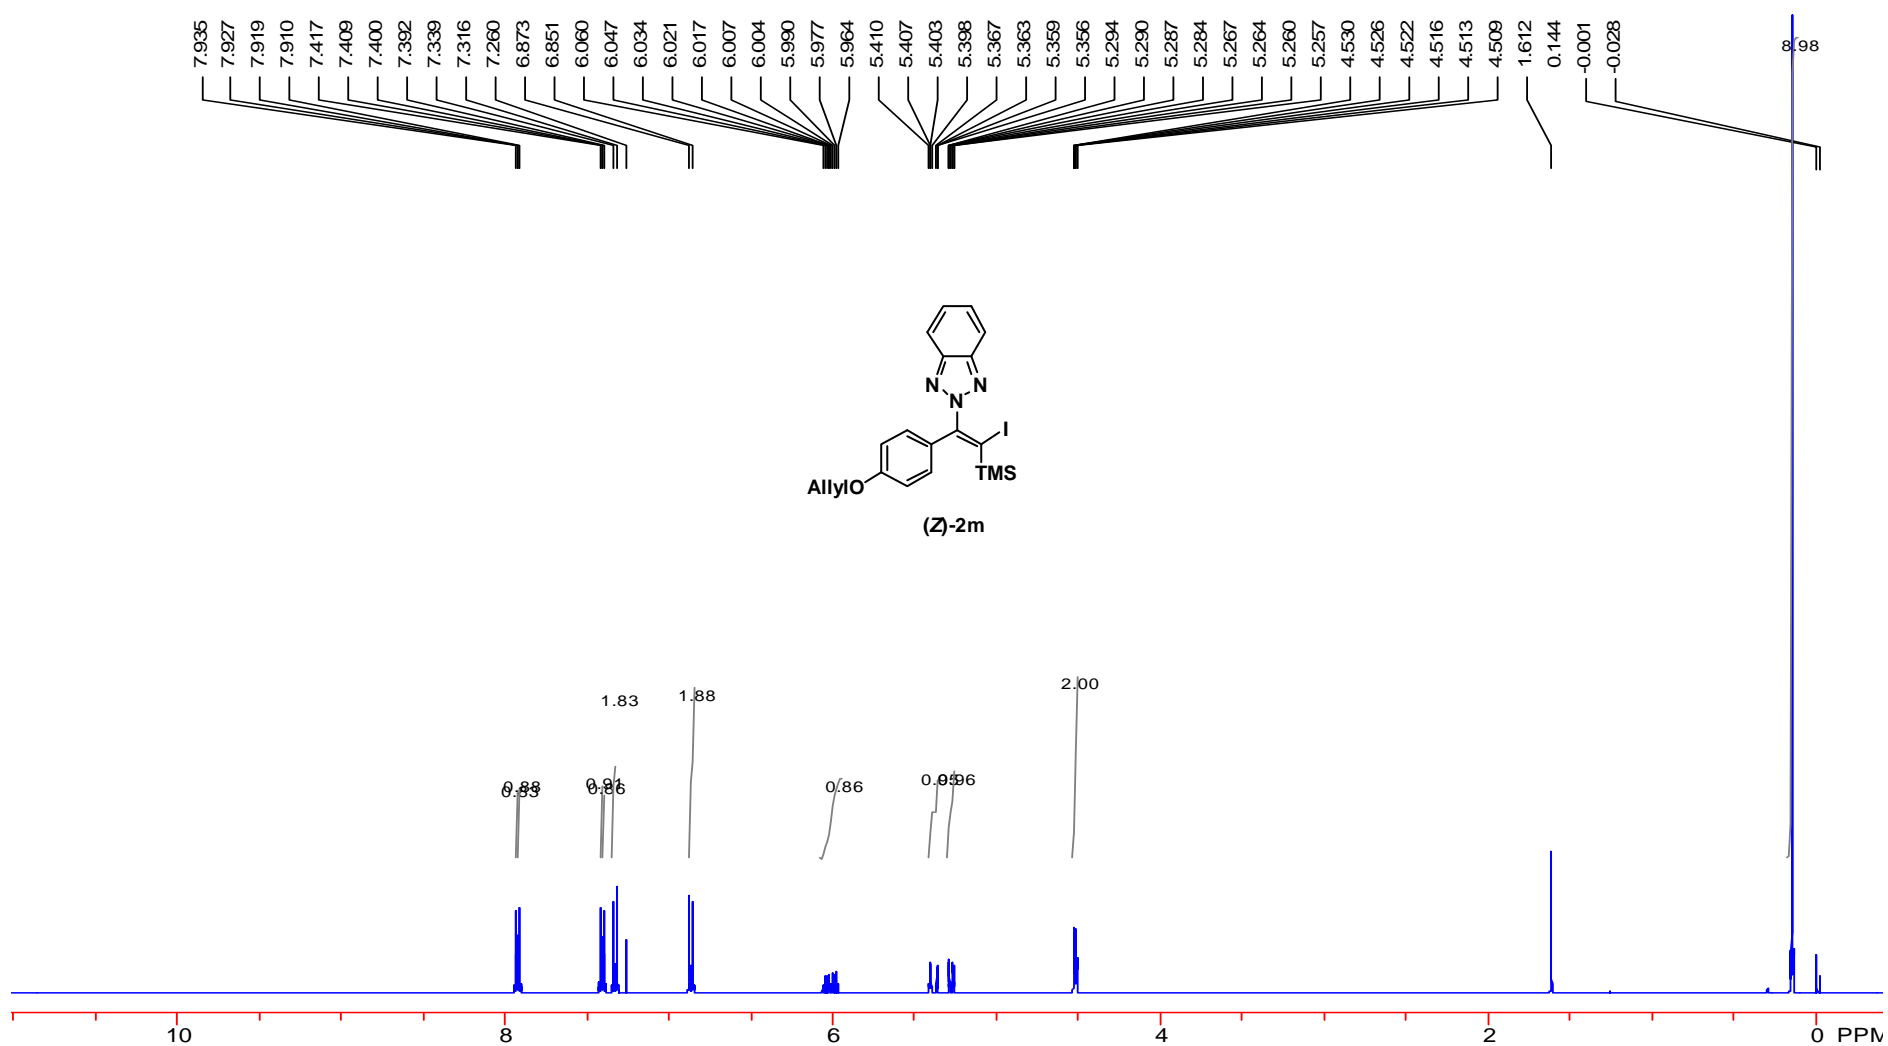

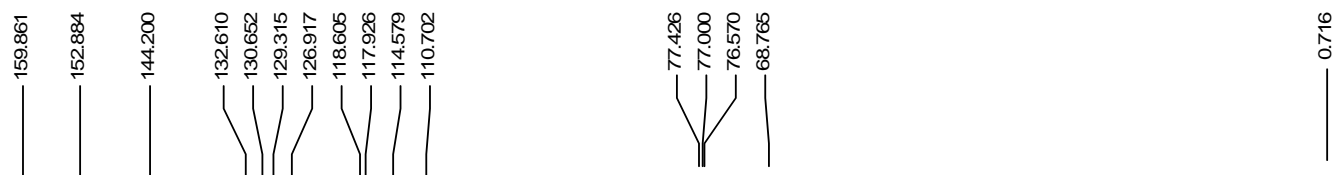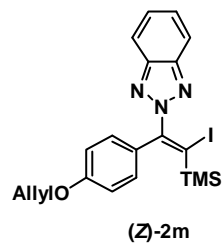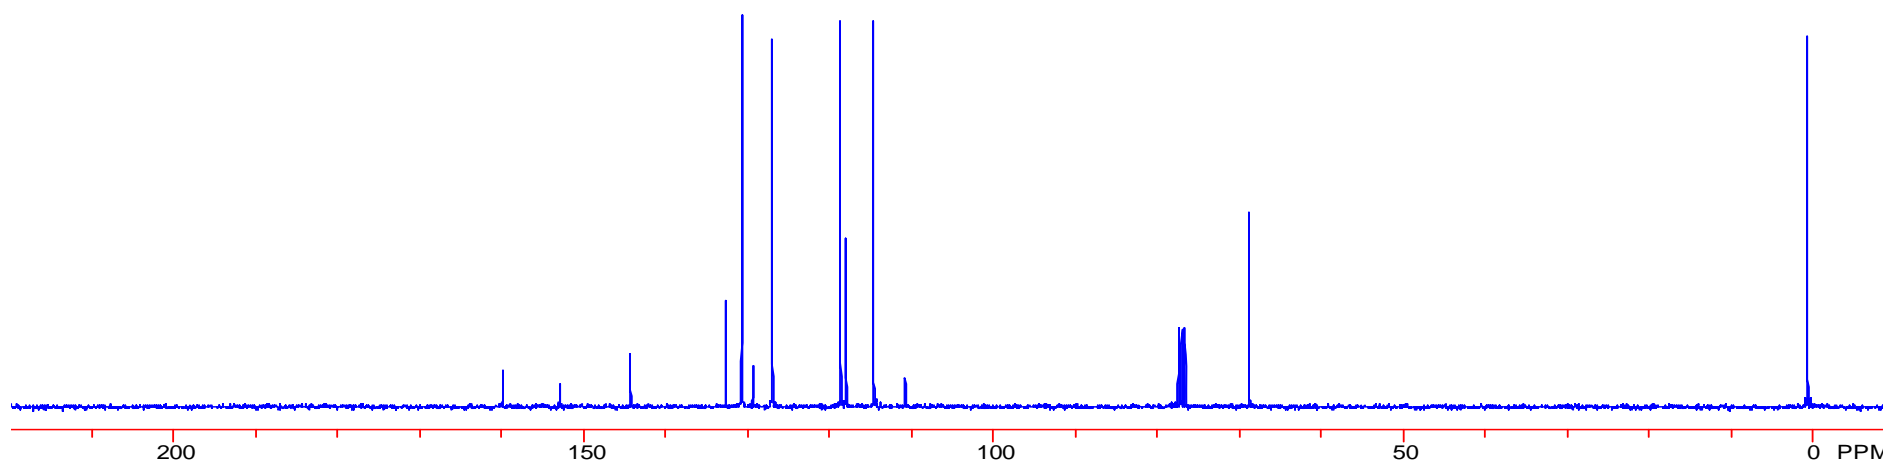

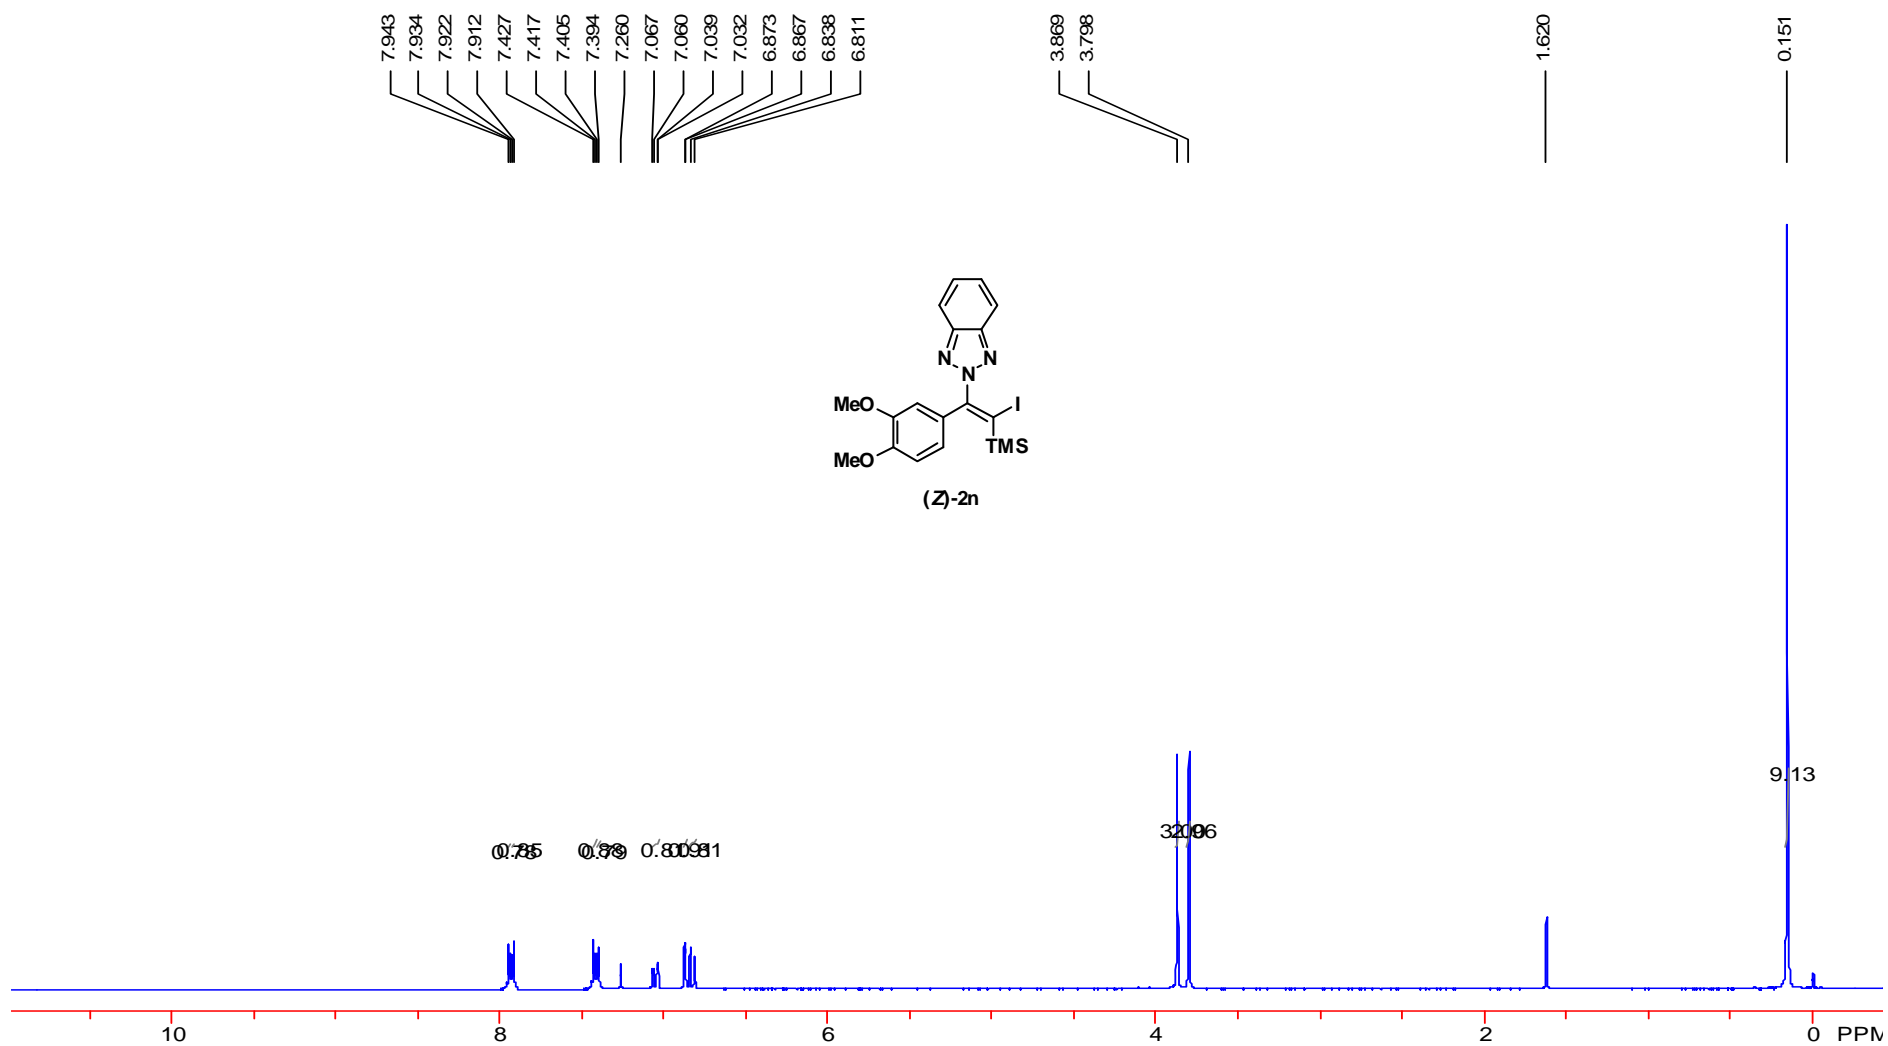

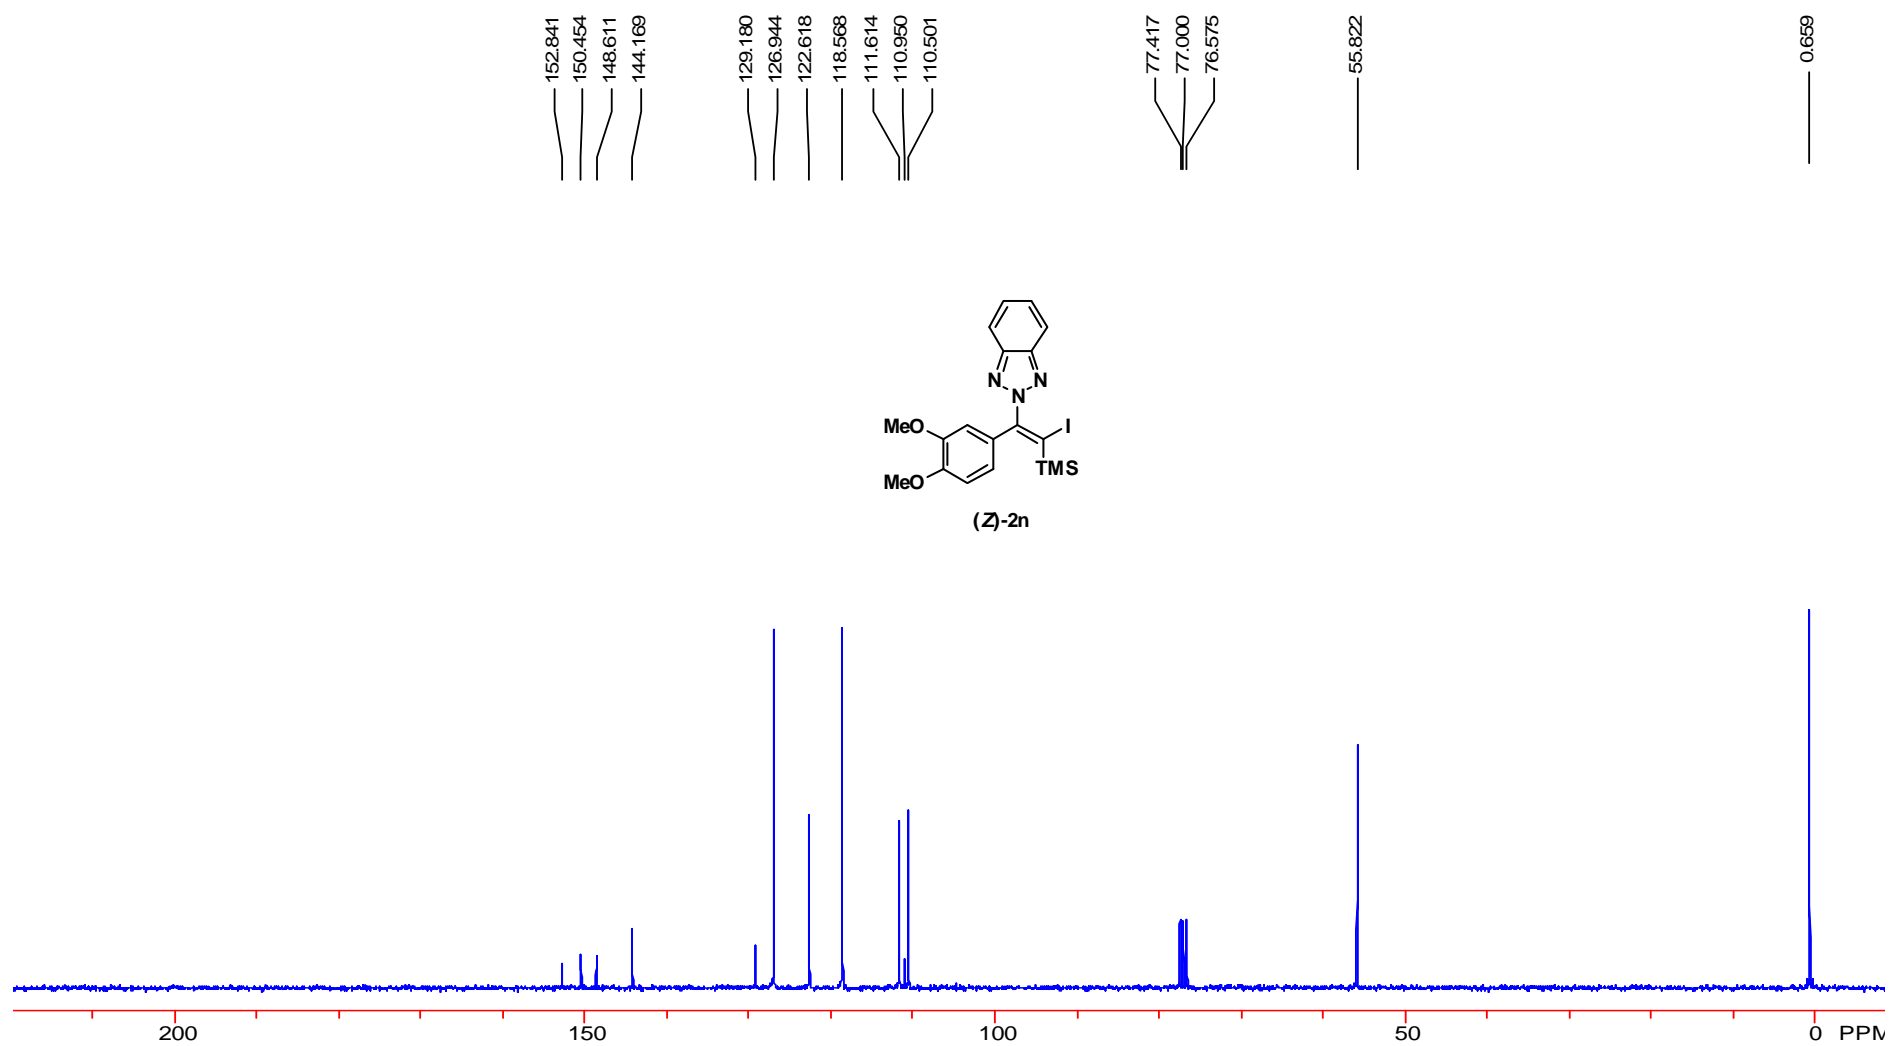

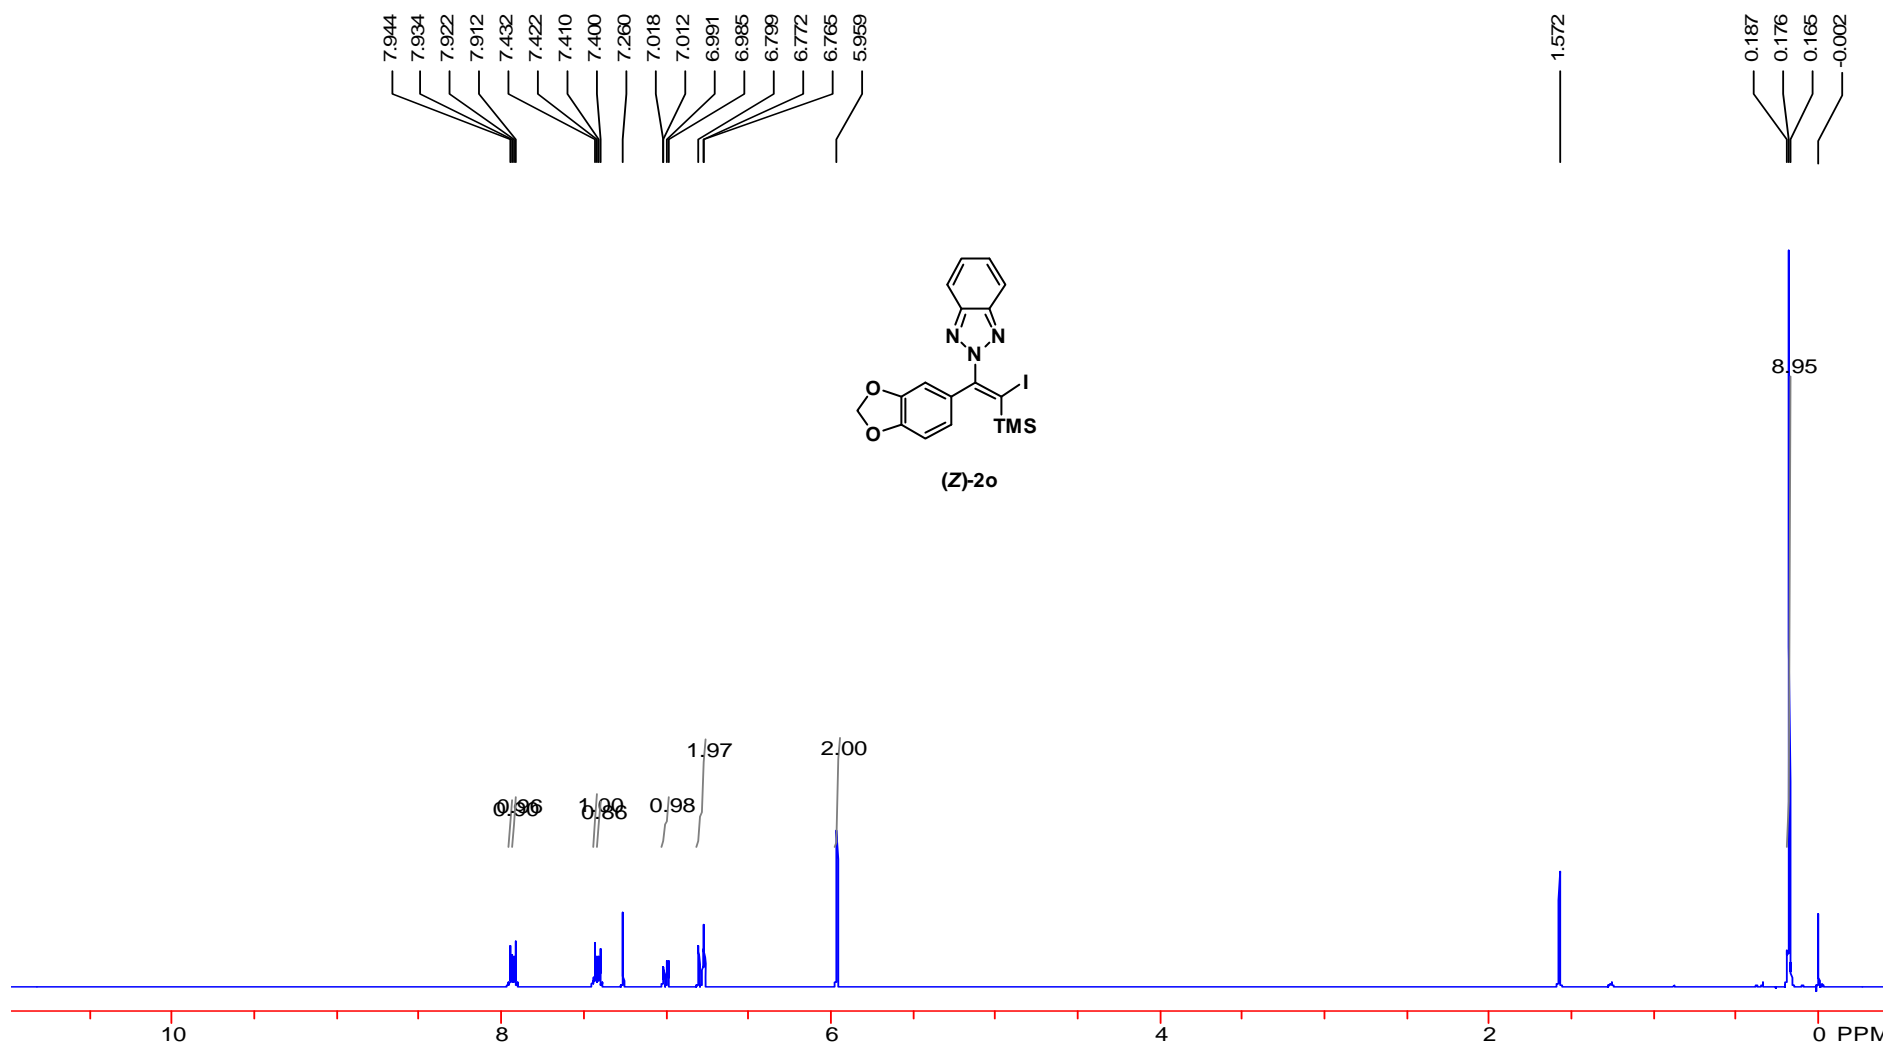

152.474  
149.133  
147.623  
144.211

130.408  
127.007  
124.119  
118.598  
111.223  
108.905  
108.057  
101.530

77.432  
77.000  
76.581

0.726

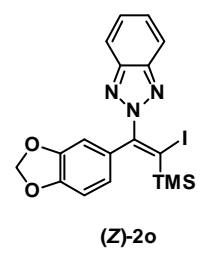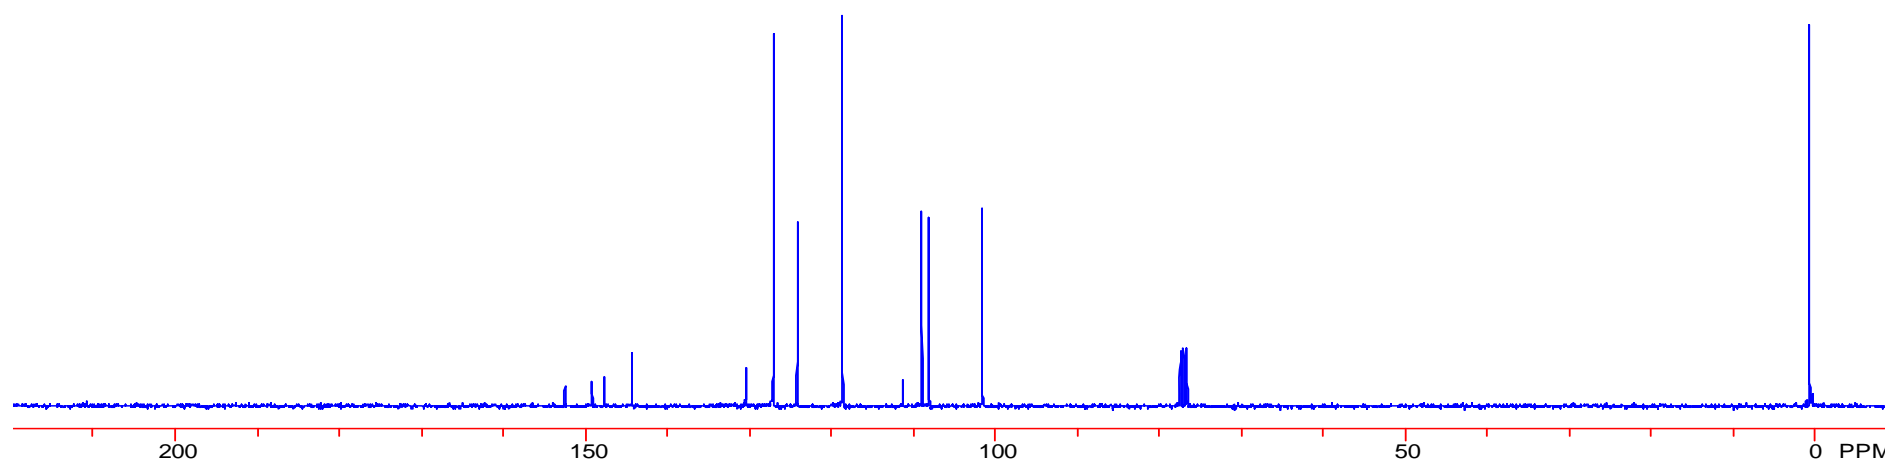

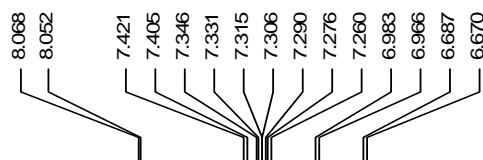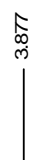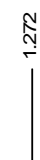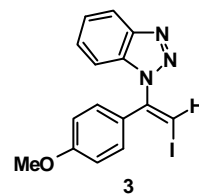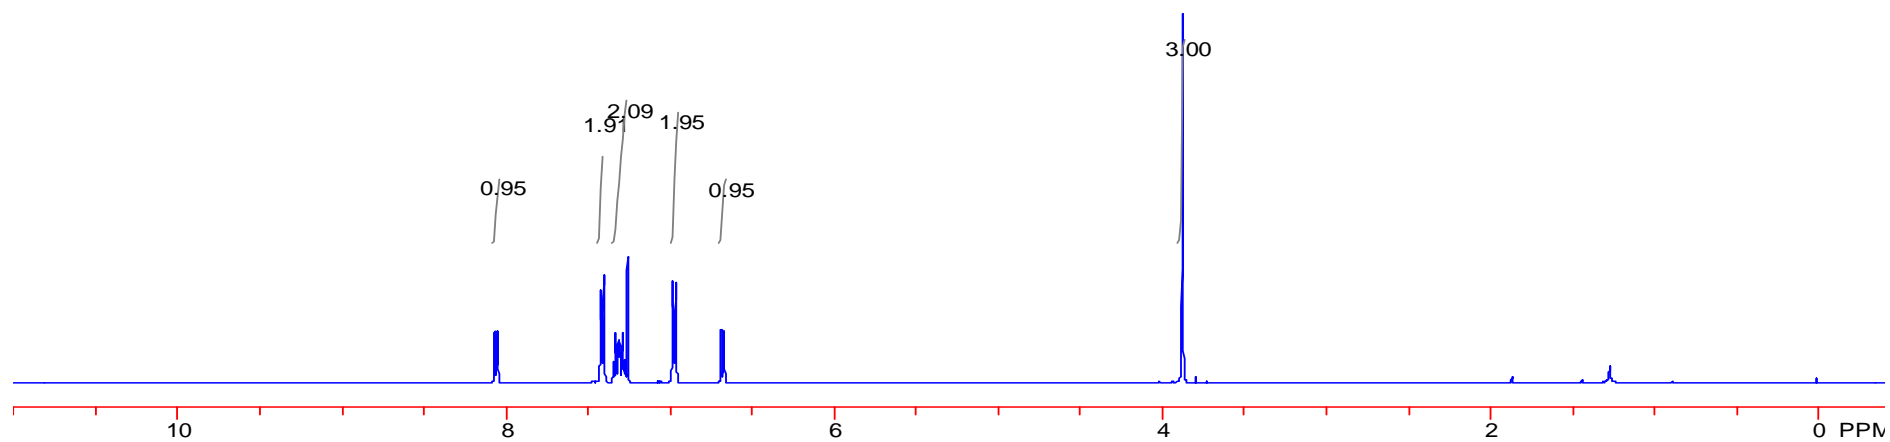



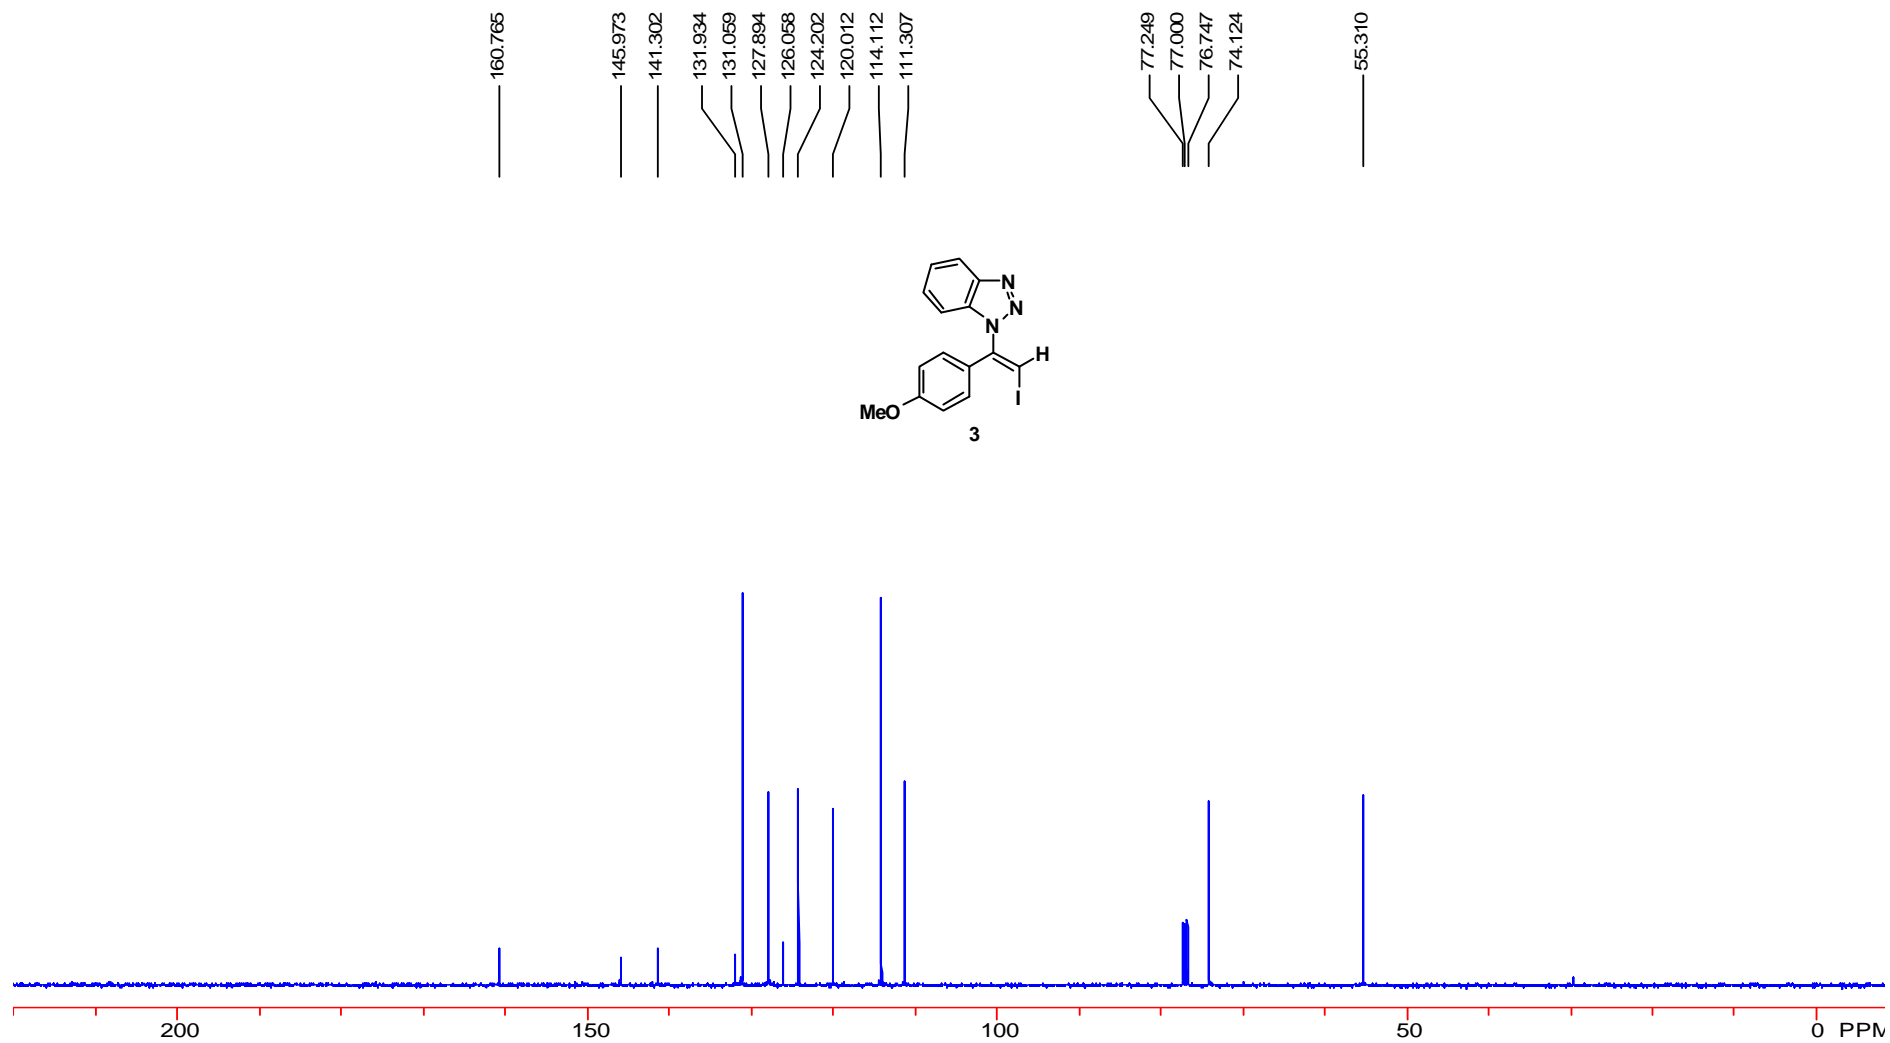

Supplement: c3ra43075h.pdf [file c3ra43075h.pdf]
